# Supplementary material for: Cataclastic deformation of triaxially deformed, cemented mudrock (Callovo Oxfordian Clay): an experimental study at the micro/nano scale using BIB-SEM
Source: Copernicus journal article supplement (doi:10.5194/se-2016-131), 2016-10-04
Supplement: Supplementary file [file se-2016-131-AC1-supplement.pdf]

1 **Deformation in cemented mudrock (Callovo Oxfordian Clay) by micro-**  
2 **cracking, granular flow and phyllosilicate plasticity: insights from**  
3 **Triaxial Deformation, Broad ion Beam polishing and Scanning Electron**  
4 **Microscopy**

5 Guillaume Desbois<sup>1</sup>, Nadine Höhne<sup>1</sup>, Janos L. Urai<sup>1</sup>, Pierre Bésuelle<sup>2</sup>, Gioacchino Viggiani<sup>3</sup>

6 <sup>1</sup>*Structural Geology, Tectonics and Geomechanics, RWTH Aachen University, Lochnerstrasse 4-20,*  
7 *52056 Aachen, Germany*

8 <sup>2</sup>*CNRS, 3SR, Grenoble, France*

9 <sup>3</sup>*Université Grenoble Alpes, 3SR, Grenoble, France*

10 **Abstract**

11 The macroscopic description of deformation and fluid flow in mudrocks can be improved by a better  
12 understanding of microphysical deformation mechanisms. Here we use a combination of Scanning  
13 Electron Microscopy (SEM) and Broad Ion Beam (BIB) polishing to study the evolution of  
14 microstructure in samples of triaxially deformed Callovo-Oxfordian Clay. Digital Image Correlation  
15 (DIC) was used to measure strain field in the samples, and as a guide to select regions of interest in the  
16 sample for BIB-SEM analysis. Microstructures show evidence for dominantly cataclastic and minor  
17 crystal plastic mechanisms (intergranular, transgranular, intragranular cracking, grain rotation, clay  
18 particle bending) down to nm- scale. At low strain, the dilatant fabric contains individually  
19 recognizable open fractures, while at high strain the reworked clay gouge also contains broken non-  
20 clay grains and smaller pores than the undeformed material, resealing the initial fracture porosity.

21 **Keywords:** cemented mudrock, Callovo Oxfordian Clay, triaxial deformation, clay microstructure,  
22 deformation mechanisms, BIB-SEM, DIC, cataclastic deformation

23 **1 Introduction**

24 Mudrocks constitute up to 80% of the Earth's sedimentary rocks (Stow, 1981). Due to their low  
25 permeability and self-sealing properties (Boisson, 2005, Bernier et al., 2007), claystones are  
26 considered for nuclear waste disposal and seals for storage in deep geological formations (Salters &  
27 Verhoef, 1980; Shapira 1989; Neerdael & Booyazis, 1997; Bonin, 1998; Ingram & Urai, 1999;  
28 ONDRAF/NIRAS, 2001; NAGRA, 2002; NEA, 2004; ANDRA 2005; IAEA, 2008). Predictions of

29 mechanical and transport properties over long time scales are essential for the evaluation of subsurface  
30 integrity. For this, it is generally agreed that a multiscale experimental approach that combines  
31 measurement of bulk mechanical and transport properties with microstructural study to identify  
32 deformation mechanisms is required to develop microphysics-based constitutive equations, which can  
33 be extrapolated to time scales not available in the laboratory, after comparison with naturally  
34 deformed specimens (Morgenstern & Tchalenko 1967; Tchalenko, 1968; Lupini et al., 1981; Rutter et  
35 al., 1986; Logan et al., 1979, 1987, 1992; Marone & Scholz, 1989; Evans & Wong, 1992; ; Katz &  
36 Reches, 2004; Niemeijer & Spiers, 2006. Colletini et al., 2009; Haines et al., 2009, 2013; French et al.,  
37 2015; Crider, 2015; Ishi, 2016).

38 In the field of rock mechanics and rock engineering, experiments are performed to low strain and over  
39 relatively short time in order to predict damage and deformation in tunnelling and mining, for example.  
40 Here, a macroscopic and phenomenological approach is common to characterize mechanical and  
41 transport properties and to establish the constitutive laws. Microstructures are rarely studied because  
42 the strained regions are difficult to find (except macroscopic fractures), and because microstructures  
43 below micrometre scales are elusive. However, it is well established that for long-term predictions a  
44 microphysics-based understanding of mechanical and fluid flow properties in mudrocks provides a  
45 better basis for extrapolating constitutive equations beyond the time scales accessible in the laboratory.  
46 This requires integration of measurement of the mechanical and transport properties with  
47 microstructures, towards multi-scale description of deformation in mudrocks at low strain.

48 The microstructural geology community studied microstructures in deformed mudrocks to infer  
49 deformation mechanisms (Dehandschutter et al., 2004; Gratier et al., 2004; Klinkenberg et al; 2009;  
50 Renard, 2012; Robinet et al., 2012; Richard et al., 2015; Kaufhold et al., 2016), but this was limited by  
51 problems with sample preparation for high resolution electron microscopy. On the other hand, the  
52 mechanical properties and related microstructures of natural and experimental high strain fault rocks  
53 have been studied extensively (Bos & Spiers, 2001; Faulkner et al., 2003, Marone & Scholz, 1989).  
54 For Opalinus Clay (OPA) deformed in laboratory, Nüesch (1991) and Jordan and Nüesch (1989)  
55 concluded that cataclastic flow was the main deformation mechanism, with kinking and shearing on  
56 R- and P-surfaces at the micro scale, however this was only based on observations with optical  
57 microscopy, so that grain scale processes were not resolved. Klinkenberg et al. (2009) demonstrated a  
58 correlation between compressive strength and carbonate content of two claystones; this correlation is  
59 positive for OPA but negative for Callovo Oxfordian Clays (COX). This was explained by the  
60 differences in grain size, shape, and spatial distribution of the carbonate (Klinkenberg et al. 2009), cf.  
61 Bauer-Plaindoux et al. (1998). Microstructural investigations using BIB-SEM and FIB-TEM in OPA  
62 from the main fault in the Mt-Terri Underground Research Laboratory (Laurich et al., 2014, 2016)  
63 showed that inter- and transgranular microcracking, pressure solution, clay neoformation,

64 phyllosilicate crystal plasticity and grain boundary sliding all play an important role during the early  
65 stages of faulting in OPA. However, simple cataclastic microstructures are rare due to the high shear  
66 strain and there was an almost complete loss of porosity in micro- shear zones.

67 Digital Image Correlation (DIC) applied on images acquired during experimental deformation  
68 provides a method to measure directly the local displacement fields (in 2D or 3D depending on the  
69 imaging method) and quantifies locally strain over time (Lenoir et al., 2007 [Claystone, 3D, X-ray  
70 tomography]; Bornert et al., 2010 [Claystone, 2D, optical microscopy]; Bésuelle & Hall, 2011  
71 [Claystone, 2D, Optical microscopy]; Dautriat et al., 2011 [Carbonates, 2D, optical microscopy and  
72 SEM]; Wang et al., 2013, 2015 [Claystone, 2D, environmental SEM]; Fauchille et al., 2015  
73 [Claystone, 2D, Optical microscopy]; Sone et al., 2015 [Shale, 2D, SEM]). For samples with grain  
74 sizes above micrometres, this approach allows studying processes occurring at grain scale with high  
75 resolution (Hall et al., 2010 [Sand, 3D, X-ray tomography]; Andò et al., 2012 [Sand, 3D, X-ray  
76 tomography]; Bourcier et al., 2012, 2013 [rock salt, 2D, optical microscopy and environmental SEM];  
77 Wang et al., 2015 [Claystone, 2D, environmental SEM]). On claystones, DIC was used to study  
78 swelling in environmental SEM (Wang et al., 2013, 2015) to measure strain between the clay matrix  
79 and non-clay minerals.

80 Microstructural studies in naturally compacted mudrocks are currently in rapid development, enabled  
81 by the development of ion beam milling tools (e.g. Focussed Ion Beam [FIB] and Broad Argon Ion  
82 Beam [BIB]) which allow imaging of mineral fabrics and porosity down to nm- scale in very high  
83 quality cross sections with SEM and TEM (Lee et al., 2003; Desbois et al., 2009, 2011, 2013, 2016;  
84 Loucks et al., 2009; Curtis et al., 2010; Heath et al., 2011; Klaver et al., 2012; Keller et al., 2011, 2013;  
85 Houben et al., 2013, 2014; Hemes et al., 2013, 2015; Laurich et al., 2014; Warr et al., 2014; Song et  
86 al., 2016). Serial sectioning allows reconstruction of microstructure in 3D (Keller et al., 2011, 2013;  
87 Milliken et al., 2013; Hemes et al., 2015), and cryogenic techniques can image the pore fluid in the  
88 samples and avoid artefacts produced by drying (Desbois et al., 2013, 2014; Schmatz et al., 2015).

89 Previous work has shown that the mechanical properties of Callovo Oxfordian Clays (COX) do not  
90 only depend on the fraction and mineralogy of the clay but also on water content and texture (Bauer-  
91 Plaindoux et al., 1998). Chiarelli et al. (2000) showed that COX is more brittle with increasing calcite  
92 content and more ductile with increasing clay content and proposed two deformation mechanisms:  
93 plasticity induced by slip of clay sheets and induced anisotropic damage as indicated by microcracks  
94 at the interface between grains and matrix, however they provided little microstructural evidence to  
95 support this. Gasc-Barbier et al., (2004), Fabre et al., (2006), Chiarelli et al., (2003), Fouché et al.,  
96 (2004) report that the COX has an unconfined compressive strength of 20 to 30 MPa and a Young's  
97 modulus of 2 to 5 GPa. In the context of underground storage of radioactive wastes, these papers try to  
98 predict the mechanical evolution of COX over the period of thousands of years. The effects studied

99 include creep, pore-pressure dissipation, swelling, contraction, chemical effects, pressure solution and  
100 force of crystallization. Although these papers develop elaborate constitutive laws, they provide very  
101 limited microstructural observations. The need for micromechanical observations was already  
102 recognized by Yang et al. (2012) and Wang et al., (2013, 2015). From Digital Image Correlation  
103 (DIC) applied on optical and ESEM images, these authors have shown how heterogeneous strain fields  
104 correlate with microstructure and recognized shear bands and tensile microcracks.

105 For highly overconsolidated claystones from the Variscan foreland thrust belt in the Ardennes and  
106 Eifel, Holland et al. (2006) proposed an evolutionary model starting with mechanical fragmentation of  
107 the original fabric. In this model, the initial loss of cohesion is driven by kinking, folding and micro-  
108 fracturing processes with an increasing porosity and permeability. Abrasion during progressive  
109 deformation increases the amount of clay gouge, and re-sealing occurs by decrease in pore size of the  
110 clay gouge.

111 In summary, deformation mechanisms in mudrocks are poorly understood especially at low strain.  
112 Although as a first approximation the plasticity of cemented and uncemented mudrocks can be  
113 described by effective pressure- dependent constitutive models, the full description of their complex  
114 deformation and transport properties would be much improved by better understanding of the  
115 microscale deformation mechanisms. There is a wide range of possible mechanisms: intra- and  
116 intergranular fracturing, cataclasis, grain boundary sliding, grain rotation and granular flow, plasticity  
117 of phyllosilicates and the poorly known plasticity of nano-clay aggregates with the strong role of clay-  
118 bound water, cementation, fracture sealing and solution- precipitation.

119 This contribution combines stress-strain data, measurement of displacement fields by digital image  
120 correlation (DIC) with microstructural investigations in areas selected based on the DIC results. For  
121 this, we prepared millimetre-sized high quality cross sections by broad-ion-beam milling (BIB)  
122 followed by scanning electron microscopy (SEM) to infer microphysical processes of deformation  
123 with sub-micron resolution (Figure 1). The two samples used are from the Callovo-Oxfordian Clay  
124 (COX, a cemented claystone): one deformed in plane strain compression at 2 MPa confining pressure  
125 (COX-2MPa, (Bésuelle & Hall, 2011) and another in triaxial compression at 10 MPa confining  
126 pressure (COX-10MPa, Lenoir et al., 2007). Specimens were taken from the Bure site in Meuse-Haute  
127 Marne in France, and belong to the clay-rich facies of COX.

## 128 **2 Material studied and DIC-derived strain fields**

129 Triaxial experiments were performed on two COX samples collected at the ANDRA Underground  
130 Research Laboratory located at Bure (Meuse/ Haute Marne, Eastern France) at approximately 550 m  
131 below ground surface (Boisson, 2005). The clay fraction (illite/smectite, illite, chlorite) is 40–45%,

132 carbonate (mostly calcite) and quartz 25–35% and 30%, respectively and the samples contain minor  
133 feldspar, mica and pyrite (Gaucher et al., 2004).

134 The details of these experiments including instrumentation, boundary conditions and DIC  
135 interpretations are comprehensively described in Bésuelle and Hall (2011) and Lenoir et al. (2007).  
136 This contribution presents mostly the microstructural analysis performed on these previously  
137 deformed two samples.

138 The first sample considered in this study (COX-2MPa, sample reference: EST32896) was tested in  
139 plane strain compression at 2 MPa confining pressure. 2D DIC was performed on consecutive  
140 photographs of one side of the specimen (in the plane of deformation) throughout the test. Further  
141 details are given in Bésuelle and Hall (2011). The second sample (COX-10MPa) was tested in triaxial  
142 compression at 10 MPa confining pressure. 3D DIC was performed on consecutive x-ray images of  
143 the specimen obtained in a synchrotron throughout the test. Further details are given in Lenoir et al.  
144 (2007) – please note that in this publication this sample is referred to as ESTSYN01 with drilling  
145 reference EST261.

146 In the following, the relevant findings in Bésuelle & Hall (2011) and Lenoir et al. (2007) are  
147 summarized.

148 The prismatic sample COX-2MPa was tested in plane strain compression in a true triaxial apparatus at  
149 a constant value of  $\sigma_3 = 2$  MPa. The size of the specimen is 50 mm in the vertical direction, which is  
150 the direction of major principal stress ( $\sigma_1$ ), 30 mm in the direction of intermediate principal stress ( $\sigma_2$ ),  
151 and 25 mm in the direction of minor principal stress ( $\sigma_3$ ). The test was displacement-controlled, with a  
152 constant rate of displacement (in direction 1) of  $1.25 \mu\text{m/s}$ , i.e., a strain rate of  $2.5 \cdot 10^{-5} \text{ s}^{-1}$  (see  
153 Bésuelle & Hall 2011 for further details). Figure 2a shows the evolution of the differential stress ( $\sigma_1 -$   
154  $\sigma_3$ ) vs. axial strain. The curve shows a first stress peak at 0.02 axial strain, followed by a strong stress  
155 drop. Then, a slow stress increase is observed, followed by a second stress drop at 0.42 axial strain.  
156 After, the stress is quite constant. As shown in Figures 2b and 2c (gage length of  $180 \mu\text{m}$ ), these two  
157 stress drops are associated with major faulting in the specimen. The crack that appeared during the  
158 second drop is conjugate to the first crack set, which appeared at the first drop. This set of conjugate  
159 fractures, at an angle of  $20^\circ$  to  $45^\circ$  about the direction 1, will be referred to as “main synthetic  
160 fractures” in the following sections. The DIC-derived strain fields in Figures 2b and 2c also show that  
161 the development of each single conjugate fracture is accompanied by relay zones with a set of  
162 antithetic fractures. Moreover, the fracture appearing during the second stress drop (Fig. 2c) is also  
163 reactivating the first fracture and its associated antithetic fractures. At this resolution (pixel size is  $10 \times$   
164  $10 \mu\text{m}^2$ ), the set of conjugate fractures and the associated antithetic fractures are the major features of

165 localized deformation: they represent zones where the sample was sheared with damaged zones having  
166 a thickness of about 60  $\mu$  m. Dilatancy was also measured in the damaged zones mentioned above  
167 (see volumetric strain fields, Figs. 2b and 2c).

168 The cylindrical sample COX-10MPa (10 mm in diameter and 20 mm in height) was deformed in  
169 triaxial compression at a confining pressure of 10 MPa. The test was carried out under tomographic  
170 monitoring at the European Synchrotron Radiation Facility (ESRF) in Grenoble, (France), using an  
171 original experimental set-up developed at Laboratoire 3SR at the University of Grenoble Alpes  
172 (France). Complete 3D images of the specimens were recorded throughout the test using x-ray  
173 microtomography (voxel size was 14 x 14 x 14  $\mu$  m<sup>3</sup>). The test was displacement-controlled, with a  
174 displacement rate of 0.05  $\mu$  m/s, i.e., an axial strain rate of 2.5 10<sup>-6</sup> s<sup>-1</sup>. The stress-strain curve (Figure  
175 3.a) shows only one stress peak at an axial strain of 0.04. The peak stress is followed by a major stress  
176 drop corresponding to the formation of a shear fracture (referred to as “main synthetic fracture” in the  
177 following sections) oriented at an angle of 30-40° about the direction of the principal stress  $\sigma_1$  (the  
178 DIC-based maximum shear strain fields are given in Fig. 3b, gage length of 280  $\mu$ m). The DIC-  
179 derived volumetric strain fields (not shown here, see Lenoir 2006) indicate that the shear fracture is  
180 accompanied by some slight dilatancy.

### 181 **3 Methods: BIB-SEM imaging of deformed microstructures**

182 After the experiments of Lenoir et al. (2007) and Bésuelle et Hall (2011), deformed samples were  
183 stored at low vacuum and room temperature in a desiccator, where they dried slowly. From these  
184 deformed samples, sub-samples were selected to represent areas with different strain history based on  
185 the DIC analysis. For COX-2MPa, three BIB cross sections were prepared around the conjugate  
186 fractures in areas with different amount of diffuse strain (at the resolution of DIC), antithetic fractures  
187 (ROI-2, ROI-3 and ROI-4; Figures 2.d, 5.b, c, d and 6) and a fourth one in a region without  
188 measurable strain (ROI-1; Figures 2.d and 5.a). For COX-10MPa, two BIB-SEM analyses were done  
189 around the single shear fracture (Figures 3.d and 5.e, f).

190 Sub-samples were first embedded in epoxy, extracted with a low speed diamond saw in dry  
191 conditions, pre-polished dry using SiC papers (down to P4000 grade) and BIB polished in a JEOL  
192 SM-09010 cross-section polisher (for 8 h, 1.10<sup>-3</sup> – 1.10<sup>-4</sup> Pa, 6 kV, 150  $\mu$ A) to remove a 100  $\mu$ m thick  
193 layer of material interpreted to be the layer of damage after polishing with SiC papers. BIB cross-  
194 sections are all prepared parallel to the  $\sigma_1$  and direction and perpendicular to the shear fracture. The  
195 BIB cross sections of about 1.5 mm<sup>2</sup> (Figures 5 and 6) were imaged with a Supra 55-Zeiss SEM (SE2  
196 and BSE detectors at 20 kV and WD = 8 mm). Further details of the method are given in (Klaver et  
197 al., 2012, 2015, Houben et al., 2013, 2014, Hemes et al., 2013, 2015, Desbois et al., 2016).

## 198 **4 Results**

### 199 **4.1 Overview of microstructures**

200 The sub-sample without measurable strain (i.e. ROI-1\_COX-2MPa, Figure 5a) shows non-clay  
201 minerals in a clay matrix with a weak shape preferred orientation parallel to bedding (perpendicular to  
202 the experimental  $\sigma_1$ ). The clay matrix contains submicron pores typical of compaction and diagenesis,  
203 with a power law distribution of pore sizes. Pores commonly have very high aspect ratio, with the long  
204 axis oriented sub-parallel to the bedding. Mineral fabric is very similar to those in the undeformed  
205 COX sample (Figure 4, cf. Robinet et al. 2012).

206 In all other BIB cross-sections (Figures 5.c-f and 6), both samples show damaged microstructures. At  
207 the sample scale, three different types of fracture are identified: (i) the main synthetic fracture (section  
208 2), (ii) antithetic fractures (Figure 5) and (iii) joints sub-parallel to the main fracture. The material  
209 between the fracture zones has very similar microstructure to undeformed COX.

### 210 **4.2 Detailed description of microstructures**

#### 211 **4.2.1 Arrays of antithetic fractures**

212 In COX-2MPa, the antithetic fractures (Figure 6) are of two different types. *Type I* is located only in  
213 the clay matrix (Figure 7.a), with apertures up to few micrometres, with boundaries closely matching -  
214 suggesting that these are opening mode fractures (Mode I). *Type II* fractures consist of a damage zone  
215 with thickness up to 25  $\mu\text{m}$  (Figure 7.e, f, g, h, i) containing angular fragments of non-clay minerals  
216 and clay aggregates (Figure 7.h), sometimes with preferred orientation parallel to the fracture. The  
217 transition between the damage zone and the undeformed host rock is sharp (Figure 7.f, g, h, i). In  
218 relay zones the fracturing becomes so intense that the clay matrix is fragmented into submicron-size  
219 fragments (Figure 7.i). Porosity in these relay zones is locally much higher and pores much larger than  
220 in undeformed COX. Fracture boundaries usually do not match (Figure 7.h). Figure 7.e shows  
221 examples where parts of broken non-clay minerals can be matched.

222 In COX-10MPa, we observed the two types of antithetic fractures mentioned above. Antithetic  
223 fractures of *Type I* are very similar (indicated in Figure 5.f) to those in COX-2MPa but rare, whereas  
224 antithetic fractures of *Type II* contain a wider damage zone in comparison to those in COX-2MPa, in  
225 which the average grain size and the pore size is significantly smaller, consistent with stronger  
226 cataclasis at high confining pressure. In parts of the damage zones interpreted to be restraining  
227 sections, pores in the reworked clay aggregates cannot be resolved in the SEM.

228 In both samples, the fragments between the arrays of antithetic fractures show only minor deformation  
229 indicated by fractured grains of organic matter (Figure 7.b), calcite (Figure 7.d, c) or quartz (Figure  
230 7.d). Visible relative rotation of parts of fractured grain is rare (Figure 7.d).

#### 231 **4.2.2 Synthetic fractures**

232 The synthetic fractures are the regions that localized most of strain and have the thickest damage zone  
233 (Figures 2 and 3). Here, COX-2MPa and COX-10MPa show very similar microstructures. The grain  
234 (fragment) size of non-clay minerals is significantly smaller than in the host rock and their sizes are  
235 poorly sorted. In comparison to undeformed sample (Figure 4.a), non-clay minerals have also  
236 dominant angular or/and chipped edges (Figures 8, 9 and 11). Locally, grains in the damaged zone  
237 show trans-granular fractures (Figure 9.c and 11.a). In parts of the damage zone, dilatancy and a  
238 strong increase in connected porosity (ROI-4\_COX-2MPa, Figure 8) are indicated by epoxy  
239 impregnation. In other parts, (ROI-1\_COX-10MPa, Figures 9 and 10) strongly reworked clay matrix  
240 is not impregnated and shows no pores visible at the resolution of image (83.8 nm pixel size in Figure  
241 10.b, c).

242 For COX-2MPa, the DIC analysis shows that the conjugated synthetic fractures form a complex  
243 network of fracture's branches at region where they both intersect (Figure 2.c). The ROI-3\_COX-  
244 2MPa sub-sample (Figure 2.d) covers two of these branches. Microstructural analysis of these two  
245 branches in ROI-3\_COX-2MPa show similar microstructures, with only the fracture apertures being  
246 different (Figure 5.c).

247 In both COX-2MPa and COX-10MPa, the damage zone of the synthetic fractures contains an open  
248 fracture (Figures 8, 9 and 11), with apertures of 50 - 70  $\mu\text{m}$ . These large open fractures are filled with  
249 epoxy, have matching boundaries and never crosscut the non-clay minerals in the damage zone.  
250 Similar fractures are found in COX-2MPa but parallel to the antithetic fractures, with jagged  
251 morphologies, matching walls never crossing the non-clay minerals (Figure 7.b, c, e). These fractures  
252 are not resolved by DIC, at the resolution of the X-ray images and at the strain gage length used in this  
253 contribution.

## 254 **5 Discussion**

### 255 **5.1 Artefacts caused by drying and unloading**

256 Claystones are sensitive to changes in hydric conditions that can lead to the shrinkage or the swelling  
257 of the clay matrix (Galle, 2001; Kang et al., 2003; Soe et al., 2007; Gasc-Barbier & Tessier, 2007;



258 Cosenza et al., 2007; Pineda et al., 2010; Hedan et al., 2012; Renard, 2012; Wang et al., 2013, 2015;  
259 Desbois et al., 2014).

260 The DIC analysis is not affected by this because the images were acquired during deformation of  
261 preserved (wet) samples. SEM analysis is done on samples which have been deformed and unloaded,  
262 followed by slow drying in low vacuum and further dehydration in the high vacuum of the BIB and  
263 SEM. In COX-10MPa, this is illustrated by Figures 3.c and 3.d. Figure 3.c shows the sample at the  
264 end of the deformation experiment, whereas Figure 3.d shows the same sample but about 10 years  
265 later, both imaged with X-ray. The comparison of Figures 3.c and 3.d shows that cracks developed  
266 parallel to the bedding and that the apertures of fractures developed during the deformation became  
267 larger. These are interpreted to result from unloading and shrinkage during drying of specimens.  
268 Though the second sample was not scanned with X-ray in dry condition, we infer that similar changes  
269 occurred also in COX-2MPa: by analogy, there is no reason that the clay matrix in COX-2MPa  
270 behaves differently than in COX-10MPa.

271 The considerations above indicate that some fractures developed during deformation but drying  
272 damage overprinted them. Unfortunately, BIB-SEM images (performed on dried samples) do not  
273 provide direct information to distinguish if the visible fractures and cracks developed during  
274 deformation (and subsequently overprinted by drying) or only by drying. However, as presented in the  
275 following paragraphs, indirect evidence suggests that the fractures in the fragments between the arrays  
276 of antithetic fractures and the antithetic fractures of *Type I* and of *Type II* developed during  
277 deformation.

278 The fractures in the fragments between the arrays of antithetic fractures (Figure 7.b,c,d) are not  
279 present in the low strain ROI-1\_COX-2MPa, and they are sub parallel to  $\sigma_1$  and cross-cut the bedding,  
280 suggesting strongly they are formed by experimental deformation.

281 Antithetic fractures of *Type II* (Figures 5, 6 and 7.e-i) are interpreted to develop during deformation  
282 because: (i) the internal microstructures and fabrics are damaged and (ii) DIC recorded a clear  
283 localization of strain in these. Though the antithetic fractures of *Type I* are not clearly recognized at  
284 the resolution of DIC, most of these in COX-2MPa (Figure 7.a) are interpreted to develop during  
285 deformation because they are oblique to the bedding and parallel to the antithetic fractures of *Type II*  
286 (Figure 5, 6 and 7.f-g). One exception is the antithetic fractures of *Type I* observed in ROI-1\_COX-  
287 10MPa (Figure 5.e), which is parallel to bedding. Mode I fractures sub-parallel to the main synthetic  
288 fractures are less easy to interpret: they may be related to the rotation of blocks between the antithetic  
289 fractures (Kim et al., 2004). Cryogenic techniques to preserve wet fabrics combined with ion beam  
290 milling and cryo-SEM (Desbois et al., 2008, 2009, 2013, 2014) is the dedicated technique to address  
291 this question in the future.

## 292 **5.2 Deformation mechanisms**

293 In our experiments, differential stresses exceed the confining pressure by a factor of 3-15, which  
294 would suggest that dilatant fracturing prevails over other mechanisms (e.g. Kohlstedt et al., 1995).  
295 This is partly corroborated from the stress-strain measurements that show major stress drops after  
296 peaks of stress (Figures 2 and 3). In agreement with this, at micro-scale the first conclusion based  
297 on the microstructural observations above is the dominantly cataclastic deformation in Callovo-  
298 Oxfordian Clay at confining pressures up to 10 MPa. Microfracturing, producing fragments at a range  
299 of scales and reworking into a phyllosilicate-rich cataclastic gouge during frictional flow are the main  
300 processes in both samples. This is accompanied by dilatancy and by microfracturing of the original  
301 fabric, but also by progressive decrease of porosity and pore size in the gouge with the non-clay  
302 particles embedded in reworked clay. The structure of macro-scale fracture in the samples compares  
303 well with Ishii et al., (2011, 2016).

304 Although in many cases the initial fractures propagate around the hard non-clay grains, there is also  
305 significant fracturing of the hard non-clay minerals (e.g. Figure 7.b-d). This can be due to local stress  
306 concentrations at contacts between adjacent non-clay clay minerals, or because the clay matrix is so  
307 strongly cemented that it can transmit stresses sufficient to fracture calcite and quartz grains. Broken  
308 non-clay minerals can displace or rotate with respect to each other (Figure 7.d) with local dilatancy  
309 during deformation (Figure 2.b), in agreement with the interpretation of DIC measurements in  
310 Bésuelle & Hall (2011) and Lenoir et al. (2007).

311 In COX-2MPa, the propagation of antithetic fractures of Type I (Figure 7.a) is predominantly in the  
312 clay matrix. This is in agreement with the smaller strain in comparison to antithetic fractures of Type  
313 II. Antithetic fractures of Type II contain angular non-clay grains with size smaller than those in the  
314 host rock. We interpret these as evidence for comminution by grain fracturing. Matching broken  
315 grains (Figure 7.e) are rare and in agreement with high strain cataclastic flow. Fragments of clay  
316 aggregates in the antithetic fractures of Type II are much less coherent (Figure 7.h) and more porous  
317 than the undeformed COX (Figure 7.i), indicating strong remolding by cataclastic flow, and perhaps  
318 also plastic deformation of phyllosilicates. Here, because pore morphologies do not show typical  
319 shapes that originate from drying, we interpret that these developed during deformation.

320 Microstructures in the main synthetic fractures, both in COX-2MPa (Figure 8) and COX-10 MPa  
321 (Figures 9 and 11), are similar. Angular non-clay minerals in the reworked clay matrix have a wide  
322 range of grain sizes, smaller than those in the host rock. These characteristics are typical for cataclasis  
323 (Passchier & Trouw, 2005). COX-2MPa the cataclastic gouge seems to be more porous than in COX-  
324 10 MPa; this is as expected for the lower mean stress, but firm conclusions require further study to  
325 exclude that this is an unloading and drying effect. For COX-10MPa, the porosity in clay matrix is

326 clearly reduced in comparison to the one in the host rock: most pores, if present, are below the  
327 resolution of SEM (Figure 9 and 10). The mechanism of this compaction during shearing is interpreted  
328 to be a combination of cataclasis of the cemented clay matrix, and shear-induced rearrangement of  
329 clay particles around the fragments of non-clay particles.

### 330 **5.3 Conceptual model of microstructure development in triaxially deformed COX.**

331 Based on BIB-SEM microstructural observations, we propose the following sequence of micro-  
332 mechanisms Callovo-Oxfordian clay (Figure 12):

#### 333 (1) & (2) Micro-fracturing

334 Incipient deformation occurs by intergranular microfractures propagating in the clay matrix and,  
335 transgranular and intragranular micro fractures in non-clay minerals, both resulting in the  
336 fragmentation of the original fabric and in agreement with the high compressive strength of this  
337 cemented mudstone. Intergranular micro fractures are interpreted to be initiated from pores,  
338 propagating along weak contacts at non-clay mineral / clay matrix interfaces or along (001) cleavage  
339 planes of phyllosilicates (Chiarelli et al., 2000; Klinkenberg et al., 2009; Den Hartog & Spiers, 2014,  
340 Jessel et al., 2009). Here note that probably the biggest unknown at present in the micro-mechanisms  
341 of deformation in claystones is the nature of cement bonds between grains; further work in this project  
342 is aimed at understanding this better.

#### 343 (3 & 4) Cataclastic shearing with plasticity of phyllosilicates, macroscopic failure

344 Further deformation occurs by frictional sliding affecting the process zone at microfracture boundaries,  
345 and in relays between fractures. Mechanisms are abrasion and bending of phyllosilicates by cataclastic  
346 and crystal plastic mechanisms. This is accompanied by rotation of fragments and cataclastic flow.  
347 This stage is interpreted to start at the peak stress in the stress-strain curve, accompanied by local  
348 dilatancy. At the specimen scale, fractures link up resulting in loss of cohesion. In restraining sections  
349 along the fractures, reworking of the clay matrix reduces porosity and eliminates large pores, changing  
350 the pore size distributions. The specimen suffers from a major loss of cohesion accompanied by  
351 dilatancy and stress drop after peak stress.

#### 352 (5) Resealing of the damage zone by shear and pore collapse, evolution of clay gouge

353 Ongoing abrasion of the fragments and comminution develop a cataclastic fabric. A full understanding  
354 of the deformation mechanisms in cataclastic clay aggregates requires more work, but the grain sliding  
355 (Chiarelli et al., 2000) and grain rotation between low-friction clay particles together with collapsing  
356 of porosity is inferred because: (i) slip on the (001) basal planes of clay particles is much easier than

357 shearing related to grain breakage (cf. Haines et al., 2013 and Crider, 2015) and (ii) residual strength  
358 observed after specimen's failure argues for sliding between low frictional clay particles (Lupini et al.,  
359 1981). At sufficiently high strain this stage would correspond to the residual strength result in the  
360 resealing of initial fracture porosity by filling the fractures with clay gouge. In this stage, cataclasis of  
361 non-clay particles is expected to become less important because they are embedded in reworked clay.

362 The conceptual model above for microstructure evolution in triaxially deformed COX is a first look  
363 based on direct grain-scale observation of microstructures. Our ongoing studies focus on the nature of  
364 the cement and at microstructures of the damage zone at fracture tips to better understand the  
365 localization mechanisms.

## 366 **6 Conclusions**

367 The integration of bulk stress-strain data, the analysis of displacement fields by 3D and 2D digital  
368 image correlation (DIC) with Broad Ion Beam cutting and Scanning Electron Microscopy (BIB-SEM)  
369 is a powerful multiscale method to study the deformation behaviour of mudstones.

370 We studied samples of Callovo-Oxfordian Clay (COX) subjected to triaxial compression at 2 MPa and  
371 10MPa confining pressure. DIC was used to locate regions deformed to different states of strain and  
372 BIB-SEM allows microstructural investigations of mineral and porosity fabrics down to nanometre  
373 scale.

374 Microstructures show evidence for dominantly cataclastic mechanisms (intergranular, transgranular,  
375 intragranular cracking, grain rotation, clay particle bending) down to nm- scale.

376 At low strain, the dilatant fabric contains individually recognizable open fractures, while at high strain  
377 in shear fractures the reworked clay gouge evolves towards smaller pores than the undeformed  
378 material and corresponding resealing of initial fracture porosity. This shear induced resealing is more  
379 important at the higher confining pressure.

380 This study provides a first step towards a microphysical basis for constitutive models of deformation  
381 and fluid flow in cemented mudstones, with an improved extrapolation of these models for long time  
382 scales.

383 In the future, the microstructures on experimentally deformed specimens needs to be compared with  
384 the microstructures in naturally deformed claystones (Laurich et al.; 2014) in order to help extrapolate  
385 the constitutive models to long time scales.

386 **Acknowledgements**

387 We thank ANDRA for providing samples. We are really grateful to the reviewers Dresen G. and  
388 Dimanov A. for their constructive and valuable comments.

389 **References**

- 390 Andò E., Hall S.A., Viggiani G., Desrues J., Besuelle P. (2012). Grain-scale experimental investigation of  
391 localised deformation in sand: a discrete particle tracking approach. *Acta Geotechnica*, 7: 1–13.
- 392 ANDRA (2005a). Evaluation of the feasibility of a geological repository in an argillaceous formation.  
393 Meuse/Haute Marne site. Dossier 2005, Argiles - Report Series, ANDRA.
- 394 Bauer-Plaindoux C., Tessier D., Ghoreychi M. (1998). Propriétés mécaniques des roches argileuses carbonatées:  
395 importance de la relation calcite-argile. *C. R. Acad. Sci. Paris, Sciences de la Terre et des planètes / Earth and*  
396 *Planetary Sciences*, 326, 231-237.
- 397 Bernier et al. (2007). Fractures and Self-healing within the Excavation Disturbed Zone in Clays (SELFRAC).  
398 Final report, European Commission, CORDIS Web Site, EUR 22585, 2007, 56p.
- 399 Bésuelle P. & Hall S.A. (2011). Characterization of the Strain Localization in a Porous Rock in Plane Strain  
400 Condition Using a New True-Triaxial Apparatus. *Advances in bifurcation and degradation in geomaterials*,  
401 *Springer Series in geomechanics and geoen지니어ing*, Volume 11:345-352.
- 402 Boisson, J. Y. (2005): Clay Club Catalogue of Characteristics of Argillaceous Rocks,  
403 OECD/NEA/RWMC/IGSC (Working Group on measurement and Physical understanding of Groundwater flow  
404 through argillaceous media) august 2005 Report NEA no. 4436 (Brochure and CD-Rom including data base).  
405 OECD/NEA Paris, France, 72.
- 406 Bonin B. (1998). Deep geological disposal in argillaceous formations: studies at the tournemire test site. *Journal*  
407 *of Contaminant Hydrogeology*, 35: 315-330.
- 408 Bornert M., Vales F., Gharbi H., Nguyen Minh D. (2010). Multiscale full-field strain measurements for  
409 micromechanical investigations of the hydromechanical behaviour of clayey rocks, *Strain*, 46(1): 33-46.
- 410 Bos B., Spiers C.J. (2001). Experimental investigation into the microstructural and mechanical evolution of  
411 phyllosilicate-bearing fault rock under conditions favouring pressure solution. *Journal of Structural Geology*, 23:  
412 1187–1202.
- 413 Bourcier M., Bornert M, Dimanov A., heripré E., Raphanel J.L. (2013). Multiscale experimental investigation of  
414 crystal plasticity and grain boundary sliding in synthetic halite using digital image correlation. *Journal of*  
415 *Geophysical Research, Solid Earth*, 118(2): 511.526.
- 416 Bourcier M., Dimanov A., Héripéré E., Raphanel J.L., Bornert M., Desbois G. (2012). Full field investigation of  
417 salt deformation at room temperature: cooperation of crystal plasticity and grain sliding. In *mechanical behavior*  
418 *of salt VII*, Berest, Ghoreychi, Hadj-Hassen & Tijani (eds), Taylor & Francis group, London: 37 – 43.
- 419 Chiarelli A.S., J.F. Shao, N. Hoteit (2003) Modeling of elastoplastic damage behavior of a claystone.  
420 *International Journal of Plasticity* 19:23–45
- 421 Chiarelli A.S., Ledesert B., Sibal M., Karami M., Hoteit N. (2000). Influence of mineralogy and moisture  
422 content on plasticity and induced anisotropic damage of a claystone: application to nuclear waste disposal. *Bull.*  
423 *Soc. géol. France*, 171(6), 621- 627.
- 424 Collettini C., Niemeijer A., Viti, C. Marone C. (2009). Fault zone fabric and fault weakness. *Nature*, 462, 907–  
425 10.

- 426 Cosenza P., Ghorbani A., Florsch N., Revil A. (2007). Effects of Drying on the Low-Frequency Electrical  
427 Properties of Tournemire Argillites. *Pure and applied Geophysics*, 164(10): 2043-2066.
- 428 Crider J.G. (2015). The initiation of brittle faults in crystalline rock. *Journal of Structural Geology*, 77: 159-174.
- 429 Curtis M.E., Ambrose R.J., Sondergeld C.H., Rai C.S. (2010). Structural Characterization of Gas Shales on the  
430 Micro- and Nano-Scales, Canadian Unconventional Resources and International Petroleum Conference. Society  
431 of Petroleum Engineers, Calgary, Alberta, Canada, p. 15.
- 432 Dautriat J., Bornert M., Gland N., Dimanov A., Raphanel J. (2011). Localized deformation induced by  
433 heterogeneities in porous carbonate analysed by multi-scale digital image correlation. *Tectonophysics*, 503 (1-2):  
434 100-116.
- 435 Dehandschutter, B., Vanduycke, S., Sintubin, M., Vandenberghe, N., Gaviglio, P., Sizun, J.-P. & Wouters, L.  
436 (2004). Microfabric of fractured Boom Clay at depth: a case study of brittle-ductile transitional clay behaviour.  
437 *Applied Clay Science*, 26(1-4): 389-401.
- 438 Den Hartog S.A.M. & Spiers C. (2014). A microphysical model for fault gouge friction applied to subduction  
439 megathrusts. *Journal of Geophysical Research*, 119(2): 1510-1529.
- 440 Desbois G., J.L. Urai, F. Pérez-Willard, Z. Radi, S. van Offern, I. Burkart, P.A. Kukla, U. Wollenberg (2013).  
441 Argon broad ion beam tomography in cryogenic scanning electron microscope: a novel tool for the investigation  
442 of preserved representative microstructures. Application to rock salt and other sedimentary rocks.. *Journal of*  
443 *Microscopy*, 249(3): 215-235.
- 444 Desbois G., Urai J.L., Hemes S., Schröppel B., Schwarz J.-O., Mac M., Weiel D. (2016). Multiscale analysis of  
445 porosity in diagenetically altered reservoir sandstone from the Permian Rotliegend (Germany). *Journal of*  
446 *Petroleum Science and Engineering*, 140: 128-148.
- 447 Desbois G., Urai J.L. and Kukla P.A. (2009). Morphology of the pore space in claystones - evidence from  
448 BIB/FIB ion beam sectioning and cryo-SEM observations. *E-Earth*, 4 :15-22..
- 449 Desbois G., Urai J.L., Burkhardt C., Drury M.R., Hayles M., Humbel B. (2008). Cryogenic vitrification and 3D  
450 serial sectioning using high resolution cryo-FIB SEM technology for brine-filled grain boundaries in halite: first  
451 results. *Geofluids*, 8: 60-72.
- 452 Desbois G., Urai J.L., Hemes S., Brassinnes S., De Craen M., Sillen X. (2014). Nanometer-scale pore fluid  
453 distribution and drying damage in preserved clay cores from Belgian clay formations inferred by BIB-cryo-  
454 SEM. *Engineering Geology*, 170:117-131.
- 455 Desbois G., Urai J.L., Kukla P.A., Konstanty J. and Baerle C. (2011). High-resolution 3D fabric and porosity  
456 model in a tight gas sandstone reservoir: a new approach to investigate microstructures from mm- to nm-scale  
457 combining argon beam cross-sectioning and SEM imaging . *Journal of Petroleum Science and Engineering*, 78:  
458 243-257.
- 459 Evans B. & Wong T.-F. (1992). Fault mechanics and transport properties of rocks. Academic Press, International  
460 Geophysics, volume 51, pp524
- 461 Fabre, Géraldine, Frédéric Pellet (2006) Creep and time-dependent damage in argillaceous rocks International  
462 Journal of Rock Mechanics & Mining Sciences 43:950–960
- 463 Fauchille A.-L., Hedan S., Prêt D., Cosenza P., Valle V., Cabrera J. (2015). Relationships between desiccation  
464 cracking behavior and microstructure of the Tournemire clay-rock by coupling DIC and SEM methods. In  
465 *Geomechanics from micro to macro*. Soga et al. (Eds): 1421-1424.
- 466 Faulkner D.R., Lewis A.C., Rutter E.H. (2003). On the internal structure and mechanics of large strike-slip fault  
467 zones: field observations of the Carboneras fault in southeastern Spain. *Tectonophysics*, 367: 235– 251

- 468 Fouché Olivier, Hervé Wright, Jean-Michel Le Cléac'h, Pierre Pellenard (2004) Fabric control on strain and  
469 rupture of heterogeneous shale samples by using a non-conventional mechanical test *Applied Clay Science*  
470 26:367–387
- 471 French M.E., Chester F.M., Schester J.S. (2015). Micromechanisms of creep in clay-rich gouge from the Central  
472 Deforming Zone of the San Andreas Fault, *Journal of Geophysical Research, Res. Solid Earth*, 120: 827–849.
- 473 Galle C. (2001). Effect of drying on cement-based materials pore structure as identified by mercury intrusion  
474 porosimetry: A comparative study between oven-, vacuum-, and freeze-drying. *Cement and concrete research*,  
475 31(19): 1467-1477.
- 476 Gasc-Barbier M. and Tessier D. (2007). Structural Modifications of a Hard Deep Clayey Rock due to Hygro-  
477 Mechanical Solicitations. *Int. J. Geomech.*, 7(3), 227–235.
- 478 Gasc-Barbier M., S. Chanchole P. Bérest (2004) Creep behavior of Bure clayey rock. *Applied Clay Science* 26  
479 449–458
- 480 Gaucher E., Robelin C., Matray J.M., Negrel G., Gros Y., Heitz J.F., Vinsot A., Rebours H., Cassagnabere A.,  
481 Bouchet A. (2004). ANDRA underground research laboratory: interpretation of the mineralogical and  
482 geochemical data acquired in the Callovian-oxfordian Formation by investigative drilling. *Phys. Chem. Earth*,  
483 29: 55–77
- 484 Gratier J.P., Jenatton L., Tisserand D., Guiguet R. (2004). Indenter studies of the swelling, creep and pressure  
485 solution of Bure argillite. *Applied Clay Sciences*, 26: 459-472.
- 486 Haines S.H., Kaproth B., Marone C., Saffer D., Van der Pluijm B. (2013). Shear zones in clay-rich fault gouge:  
487 A laboratory study of fabric development and evolution. *Journal of structural geology*, 51: 206-225.
- 488 Haines S.H., Van der Pluijm B., Ikari M.J., Saffer D.M., Marone C. (2009). Clay fabric intensity in natural and  
489 artificial fault gouges: Implications for brittle fault zone processes and sedimentary basin clay fabric evolution.  
490 *Journal of Geophysical research*, 114, B05406
- 491 Hall S., Bornert M., Desrues J., Pannier Y., Lenoir N., Viggiani G. and Bésuelle P. (2010). Discrete and  
492 Continuum analysis of localised deformation in sand using X-ray CT and Volumetric Digital Image Correlation,  
493 *Géotechnique*, 60: 315–322.
- 494 Heath J.E., Dewers T.A., McPherson B.J.O.L., Petrusak R., Chidsey T.C., Rinehart A.J., Mozley P.S. (2011).  
495 Pore networks in continental and marine mudstones: Characteristics and controls on sealing behavior. *Geosphere*  
496 7: 429-454.
- 497 Hedan S., Cozensa P., Valle V., Dudoignon P., Fauchille A.-L., Cabrera J. (2012). Investigation of the damage  
498 induced by desiccation and heating of Tournemire argillite using digital image correlation. *International Journal*  
499 *of rock mechanics and mining sciences*, 51: 64-75.
- 500 Hemes S., Desbois G., Urai J.L., De Craen M. and Honty M. (2013). Variations in the morphology of porosity in  
501 the Boom Clay Formation: insights from 2D high resolution, BIB-SEM imaging and Mercury injection  
502 Porosimetry. *The Netherlands Journal of Geosciences*, 92(4): 275-300.
- 503 Hemes S., Desbois G., Urai J.L., Schröppel B., Schwarz J-O (2015). Multi-scale characterization of porosity in  
504 Boom Clay (HADES, Mol, Belgium) using a combination of  $\mu$ -CT, BIB-SEM and serial FIB-SEM techniques.  
505 *Microporous and Mesoporous Materials* 208, 1-20
- 506 Holland M., Urai J.L., van der Zee W., Stanjek H., Konstanty J. (2006). Fault gouge evolution in highly  
507 overconsolidated claystones. *Journal of Structural Geology*, 28: 323–332.
- 508 Houben M.A., Desbois G. and Urai J.L. (2013). Pore morphology and distribution in the shaly facies of Opalinus  
509 clay (Mont Terri, Switzerland) : insights from representative 2D BIB-SEM investigations on mm- to nm- scales.  
510 *Applied Clay Sciences*, 71(C): 82-97.

- 511 Houben M.A., Desbois G. and Urai J.L. (2014). A comparative study of representative 2D microstructures in  
512 Shaly and Sandy facies of Opalinus Clay (Mont Terri, Switzerland) inferred from BIB-SEM and MIP methods.  
513 *Marine and Petroleum Geology*, 49: 143-161.
- 514 IAEA (2008). The safety case and safety assessment for radioactive waste disposal. Draft safety guide.  
515 International atomic energy agency, report No DS 355, Vienna.
- 516 Ingram, G.M. and J.L. Urai (1999). Top-seal leakage through faults and fractures; the role of mudrock  
517 properties. *Geological Society Special Publications*, 158: 125-135.
- 518 Ishii, E. (2016), Far-field stress dependency of the failure mode of damage-zone fractures in fault zones: Results  
519 from laboratory tests and field observations of siliceous mudstone, *Journal of Geophysical Research, Solid*  
520 *Earth*, 121, doi:10.1002/2015JB012238.
- 521 Ishii, E., H. Sanada, H. Funaki, Y. Sugita, and H. Kurikami (2011), The relationships among brittleness,  
522 deformation behavior, and transport properties in mudstones: An example from the Horonobe Underground  
523 Research Laboratory, Japan, *J. Geophys. Res.*, 116, B09206, doi:10.1029/2011JB008279.
- 524 Jessell, M.W., Bons, P.D., Griera, A., Evans, L. & Wilson, C.J.L. 2009. A tale of two viscosities. *Journal of*  
525 *Structural Geology*, 31: 719-736.s
- 526 Jordan P. and Nüesch R. (1989) Deformation behavior of shale interlayers in evaporite detachment horizons,  
527 Jura overthrust, Switzerland. *Journal of Structural Geology*, 11(7): 859-871.
- 528 Kang M-S., Watabe Y. and Tsuchida T. (2003). Effect of Drying Process on the Evaluation of Microstructure of  
529 Clays using Scanning Electron Microscope (SEM) and Mercury Intrusion Porosimetry (MIP). *Proceedings of*  
530 *The Thirteenth (2003) International Offshore and Polar Engineering Conference Honolulu, Hawaii, USA, May*  
531 *25–30, 2003*
- 532 Katz O. and Reches Z. (2004). Microfracturing, damage, and failure of brittle granites. *Journal of Geophysical*  
533 *Research*, 109, B01206.
- 534 Kaufhold A., Halisch M., Zacher G., Kaufhold S. (2016). X-ray computed tomography investigation of  
535 structures in Opalinus Clay from large-scale to small-scale after mechanical testing. *Solid Earth*, 7: 1171-1183.
- 536 Keller L., Schuetz P., Erni R., Rossell, M.D., Lucas, F., Gasser, Ph., Holzer L. (2013). Characterization of multi-  
537 scale microstructural features in Opalinus Clay. *Microporous and Mesoporous Materials*, 170 : 83-94.
- 538 Keller L.M., Holzer L., Wepf R., Gasser P. (2011). 3D geometry and topology of pore pathways in Opalinus  
539 clay: Implications for mass transport. *Applied Clay Science* 52: 85-95.
- 540 Kim Y-S, Peacock D.C.P, Sanderson D.J. (2004). Fault damage zones. *Journal of Structural Geology*, 26: 503-  
541 517.
- 542 Klaver J., Desbois G., Littke R., Urai J.L. (2015). BIB-SEM characterization of pore space morphology and  
543 distribution in postmature to overmature samples from the Haynesville and Bossier Shales, *Marine and*  
544 *Petroleum Geology*, 59: 451-466.
- 545 Klaver J., Desbois G., Urai J.L. and Littke R. (2012). BIB-SEM study of porosity of immature Posidonia shale  
546 from the Hils area, Germany. *International Journal of Coal Geology*, 103: 12-25.
- 547 Klinkenberg M., Kaufhold S., Dohrmann R., Siegesmund S. (2009). Influence of carbonate microfabrics on the  
548 failure strength of claystones. *Engineering Geology* 107: 42-54.
- 549 Kohlstedt D.L., Evans B., Mackwell S.J. (1995). Strength of the lithosphere: constraints imposed by laboratory  
550 experiments. *Journal of geophysical Research*, 100(B9): 17587-17602.
- 551 Laurich B., Urai J.L., Desbois G., Vollmer C., Nussbaum C. (2014). Microstructural evolution of an incipient  
552 fault zone in Opalinus Clay: Insights from an optical and electron microscopic study of ion-beam polished



- 553 samples from the Main Fault in the Mont Terri underground research laboratory. *Journal of Structural Geology*,  
554 67: 107–128.
- 555 Laurich B., Urai J.L., Nussbaum C. (2016). Microstructures and deformation mechanisms in Opalinus Clay:  
556 insights from scaly clay from the Main Fault in the Mont Terri Rock Laboratory (CH). *Solid Earth*,  
557 doi:10.5194/se-2016-94
- 558 Lee M.R., Bland P.A., Graham G. (2003). Preparation of TEM samples by focused ion beam (FIB) techniques:  
559 applications to the study of clays and phyllosilicates in meteorites. *Mineralogical Magazine*, 67(3): 581-592.
- 560 Lenoir N., Bornert M., Desrues J., Besuelle P., Viggiani G. (2007). Volumetric digital image correlation applied  
561 to X-ray microtomography images from triaxial compression tests on argillaceous rock. *Strain*, 43: 193-205.
- 562 Logan J.M., Dengo C.A., Higgs N.G., Wang Z.Z. (1992). Fabrics of Experimental Fault Zones: Their  
563 Development and Relationship to Mechanical Behavior, in: Evans, B., Wong, T. (Eds.), *Fault Mechanics and*  
564 *Transport Properties of Rocks- A Festschrift in Honor of W. F. Brace*. Academic Press, pp. 33–67.
- 565 Logan J.M., Friedman M., Higgs N., Dengo C., Shimamoto T. (1979). Experimental studies of simulated gouge  
566 and their application to studies of natural fault zones, in: *Proceedings of Conference VIII on Analysis of Actual*  
567 *Fault Zones in Bedrock*. US Geological Survey, Open File Report, pp. 79–1239.
- 568 Logan J.M., Rauenzahn K.A. (1987). Frictional dependence of gouge mixtures of quartz and montmorillonite on  
569 velocity, composition and fabric. *Tectonophysics*, 144: 87–108.
- 570 Loucks R.G., Reed R.M., Ruppel S.C., Jarvie D.M. (2009). Morphology, Genesis, and Distribution of  
571 Nanometer-Scale Pores in Siliceous Mudstones of the Mississippian Barnett Shale. *Journal of Sedimentary*  
572 *Research* 79: 848-861.
- 573 Lupini J.F., Skinner A.E., Vaughan P.R. (1981). The drained residual strength of cohesive soils. *Géotechnique*  
574 31(2):181-213.
- 575 Marone C. and Scholz C.H. (1989). Particle-size distribution and microstructures within simulated fault gouge.  
576 *Journal of Structural Geology*, 11(7): 799-814.
- 577 Milliken K.L., Rudnicki M., Awwiller D.N., Zhang T. (2013). Organic matter-hosted pore system, Marcellus  
578 formation (Devonian), Pennsylvania: *AAPG bulletin*, 97: 177-200.
- 579 Morgenstern N.R., Tchalenko J.S. (1967). Microscopic structures in kaolin subjected to direct shear.  
580 *Geotechnique*, 17: 309-328.
- 581 Nagra (2002). Technischer Bericht 02-03, Projekt Opalinuston, Synthese der geowissenschaftlichen  
582 Untersuchungsergebnisse.
- 583 NEA (2004). Post-closure safety case for geological repositories. Nature and purpose. OECD/NEA, No 3679,  
584 Paris. France.
- 585 Neerdael B., Boyazis J.P. (1997). The Belgium underground research facility: status on the demonstration issues  
586 for radioactive waste disposal in clay. *Nuclear engineering and design*, 176: 89-96.
- 587 Niemeijer A.R., Spiers C.J. (2006). Velocity dependence of strength and healing behaviour in simulated  
588 phyllosilicate-bearing fault gouge. *Tectonophysics*, 427: 231–253
- 589 Nüesch R., (1991): *Das mechanische Verhalten von Opalinuston*. PhD Thesis, ETH Zürich. 244 p.
- 590 ONDRAF/NIRAS (2001). SAFIR 2. Safety Assessment and Feasibility Interim Report 2. NIROND 2001-06.
- 591 Passchier C.W., Trouw R.A.J. (2005). *Microtectonics*. Springer, 366 pp

- 592 Pineda J., Romero E., Gómez S., Alonso E. (2010). Degradation effects at microstructural scale and their  
593 consequences on macroscopic behaviour of a slightly weathered siltstone. In *Geomechanics and Geotechnics.*  
594 *From Micro to Macro, Two Volume Set*, Edited by Malcolm Bolton, CRC Press 2010, Pages 73–78.
- 595 Renard F. (2012). Microfracturation in rocks: from microtomography images to processes. *Eur. Phys. J. Appl.*  
596 *Phys.*, 60: 24203
- 597 Richard J., Gratier J.P., Doan M.-L., Boullier A.-M., Renard F. (2015). Rock and mineral transformations in a  
598 fault zone leading to permanent creep: Interactions between brittle and viscous mechanisms in the San Andreas  
599 Fault. *Journal of Geophysical Research, Solid Earth*, 119: 8132–8153,
- 600 Robinet J.C., Sardini P., Coelho D., Parneix J.-C., Dimitri P., Sammartino S., Boller E., Altmann S. (2012).  
601 Effects of mineral distribution at mesoscopic scale on solute diffusion in a clay-rich rock: Example of the  
602 Callovo-Oxfordian mudstone (Bure, France). *water resources research*, 48, W05554.
- 603 Rutter E. H. , Maddock R. H., Hall S. H. , White S. H. (1986). Comparative microstructures of natural and  
604 experimentally produced clay-bearing fault gouges. *Pure and Applied Geophysics* January 1986, Volume  
605 124, Issue 1, pp 3-30
- 606 Salters V.J.M. & Verhoef P.N.W. (Eds.) 1980. *Geology and nuclear waste disposal*, Vol. No.1 of *Geologica*  
607 *Ultraiectina Special Publication*, Instituut voor Aardwetenschappen der Rijksuniversiteit te Utrecht, Institute of  
608 Earth Sciences, Utrecht, 399pp.
- 609 Schmatz J., berg S., urai J., Ott H. (2015). Nano-scale imaging of pore-scale fluid-fluid-solid contacts in  
610 sandstone, *Geophysical Research Letters*, 42: 2189 – 2195
- 611 Shapira J.P. (1989). Long-term waste management: present status and alternatives. *Nuclear instruments and*  
612 *methods in Physics Research*, A280: 568-582
- 613 Soe A.K.K., Osada M., Takahashi M., Sasaki T. (2009). Characterization of drying-induced deformation  
614 behaviour of Opalinus Clay and tuff in no-stress regime. *Environmental Geology*, 58(6): 1215-1225.
- 615 Sone H., Morales L.F., Dresen G. (2015). Microscopic observations of shale deformation from in-situ  
616 deformation experiments conducted under a scanning electron microscope. *ARMA*: 15-27.
- 617 Song Y., Davy C.A., Bertier P., Troadec D. (2016). Understanding fluid transport through claystones from their  
618 3D nanoscopic pore network. *Microporous and Mesoporous Materials*, 228: 64-85.
- 619 Stow D.A.V. (1981). Fine-grained sediments: Terminology. *Quarterly Journal of engineering Geology London*,  
620 14: 243-244.
- 621 Tchalenko J.S., Morgenstern N.R. (1967). Microscopic Structures in Kaolin Subjected to Direct Shear.  
622 *Géotechnique* 17: 309–328.
- 623 Wang L. L., Bornert M., Chancole S., Heripré E., Yang S. (2015). Micromechanical experimental investigation  
624 of mudstones. *Géotechnique letters* 4, 306-309.
- 625 Wang L. L., Bornert M., Chancole S., Yang S., Heripré E., Tanguy A., Caldemaison D. (2013). Micro-scale  
626 experimental investigation of the swelling anisotropy of the Callovo- Oxfordian argillaceous rock. *Clay*  
627 *Minerals*, 48: 391–402.
- 628 Warr L.N., Wojatschke J., Carpenter B.M., Marone C., Schleicher A.M., van der Pluijm B. a. (2014). A “slice-  
629 and-view” (FIB–SEM) study of clay gouge from the SAFOD creeping section of the San Andreas Fault at 2.7  
630 km depth. *Journal of Structural Geology*, 69: 234–244.
- 631 Yang, D. S., Bornert, M., Chanchole, S. et al. (2012). Dependence of elastic properties of argillaceous rocks on  
632 moisture content investigated with optical full-field strain measurement techniques. *Int. J. Rock Mech. Mining*  
633 *Sci.* 53, 45–55.

634

## 635 **Figure captions**

636 **Figure 1:** Drawing of the experimental concept used for the investigation of experimentally deformed  
637 fine-grained mudrocks from bulk-scale to nm-scale. The example is based on a triaxial deformation  
638 test (10 MPa confining pressure) performed on a cylindrical Callovo-Oxfordian Clay, where  
639 displacement fields were followed by volumetric DIC on X-ray microtomography images (after  
640 Lenoir et al., 2007;).

641 **Figure 2:** Results of deformation test done on sample COX-2MPa. (a): deviator stress vs. axial strain  
642 response. The red star indicates the state of sample when BIB-SEM microstructural analyses are done.  
643 (b) and (c): incremental volumetric strain fields (VSF) and maximum shear strain fields (SSF) fields  
644 for deformation increment 1-2 and 3-4 indicated in (a) after DIC. Arrows with solid lines indicate the  
645 set of two conjugated synthetic fractures whereas the arrows with dashed lines show antithetic  
646 fractures oblique to the conjugated fractures. (d): Selection of differently strained areas (ROI)  
647 highlighted from DIC analysis for BIB-SEM microstructural analyses. Four ROI were analysed: three  
648 at conjugate synthetic fractures in areas with different amount of diffuse strain and antithetic fractures  
649 (ROI-2, ROI-3 and ROI-4) and one in a region without measurable strain (ROI-1). After Bésuelle et al.  
650 (2011).

651 **Figure 3:** Results of deformation test done on sample COX-10MPa. (a): deviator stress vs. axial strain  
652 response. The red star indicates the state of sample when BIB-SEM microstructural analyses are done.  
653 (b): incremental maximum shear strain fields for deformation increment 1-2 and 2-3 indicated in (a)  
654 interpreted after DIC. (c) shows the X-ray radiography of the sample taken directly at the end of the  
655 deformation test, whereas (d) shows the X-ray radiography of the same sample but taken about 10  
656 years after the end of the deformation: drying cracks developed following the bedding and the aperture  
657 of the single shear fracture became larger. (d) indicates also two ROI were analysed both around the  
658 single synthetic shear fracture. In (c) and (d): orientation of  $s_1$  and of the bedding are indicated in red.  
659 After Lenoir et al. (2007).

660 **Figure 4:** (a): BSE SEM micrograph of the typical mineral fabric in undeformed COX. (b): SE2  
661 SEM micrograph of a detail from (a) showing the typical pore fabric in undeformed COX.

662 **Figure 5:** BSE SEM micrographs of the BIB cross-sections' overviews of COX-2MPa (a-d) and  
663 COX-10MPa (e-f) at differently strained areas (ROI) highlighted from DIC analysis in Figure 4. High  
664 strained ROI (c-f), display damaged microstructures, where three different types of fracture are  
665 identified: (1) the main synthetic fracture, (2) antithetic fractures oriented about  $60^\circ$  to the main  
666 fracture and (3) joints sub-parallel to the main synthetic fracture. These fracture are respectively

667 indicated by 1, 2, 3 numbers in the figure. Orientation of the principle stress ( $s_1$ ) is indicated in red.  
668 Dashed yellow lines indicate the boundaries of the BIB polished areas.

669 **Figure 6:** Larger field of BSE SEM micrograph of the BIB cross-section's overview at ROI-1 in  
670 COX-2MPa sample. It shows the network of antithetic fractures (indicated by number 1) oblique to  
671 the principle main synthetic fracture (indicated by number 2). Orientation of the principle stress ( $s_1$ ) is  
672 indicated in red. Dashed yellow lines indicate the boundaries of the BIB polished areas.

673 **Figure 7:** Detailed microstructures in sample COX-2MPa. (a): a fracture running parallel to the  
674 antithetic fractures and at the interfaces between non-clay mineral and clay matrix. (b) and (c):  
675 intragranular fractures (i) and transgranular fractures (ii) at impingement of non-clay minerals. (d): a  
676 broken quartz grain showing evidence for rotation of its broken fragments. (e): incipient of flow of  
677 broken non-clay mineral within the antithetic fractures. (f) and (g): parts of antithetic fractures  
678 displaying thick damaged fabrics made of broken grains and clay matrix fragments. (h): Detail from  
679 (g). (i): Detail from (f) showing the denser and deformed fabric of a part of the clay matrix squeezed  
680 between a quartz grain located in the damaged fabric and the boundary with the host rock. In (f-i), the  
681 damaged zone is related to a higher porosity in comparison to the host rock. Orientation of  $s_1$  is  
682 indicated in red. Dashed yellow lines indicate the boundaries between the damaged fabric and the host  
683 rock, and also some grain boundaries. Qtz: quartz; Cc.: calcite; OM: organic matter. Black squares in  
684 (f) are missing pictures.

685 **Figure 8:** Detailed microstructure close the main fracture (indicated by number 1) in sample COX-  
686 2MPa. The main fracture displays internal damaged fabric made of fragments of broken non-clay  
687 minerals and clay matrix. Close to the main synthetic fracture, the host rock displays jagged joints  
688 sub-parallel to the main synthetic fracture (indicated by number 3) starting and ending at antithetic  
689 fracture (indicated by number 2). Orientation of the principle stress ( $s_1$ ) is indicated in red. The dashed  
690 yellow line indicates the boundary between the damaged fabric and the host rock.

691 **Figure 9:** Microstructures of ROI-1 in sample COX-10MPa. (a-c): The damaged fabric within the  
692 main fracture (1) is made of fragments of non-clay minerals derived from the dense, tight clay matrix.  
693 (a): the large open fracture in the middle of the main fracture (black) is interpreted to develop after the  
694 experiment by unloading or/and drying (see Section 5.1 for details). (c): some grains within the  
695 damaged fabric, but close to the boundary between the damaged fabric and the host rock, show  
696 transgranular fracturing (ii). Orientation of the principle stress ( $s_1$ ) is indicated in red. The dashed  
697 yellow lines indicate the boundaries between the damaged fabric and the host rock.

698 **Figure 10:** Detail of Figure 10.b. Microstructures (ROI-1\_COX-10MPa) showing detail of porosity in  
699 BSE SEM micrograph (a) and SE2 SEM micrograph (b). At the resolution of the SEM micrograph,

700 the damaged fabric appears very low porous in comparison to the host rock. The dashed yellow line  
701 indicates the boundary between the damaged fabric (left) and the host rock (right).

702 **Figure 11:** Detailed microstructures at ROI-2 in sample COX-10MPa. (a-c): The damaged fabric  
703 within the main synthetic fracture (indicated by number 1) is made of fragments of non-clay minerals  
704 and clay matrix derived from the host rock. (a): some grains within the damaged fabric, but close to  
705 the boundary between the damaged fabric and the host rock, show transgranular fracturing (ii).  
706 Detailed observations in (b) and (c) (SE2 SEM and BSE SEM micrographs of the same sub-area,  
707 respectively) show that parts of the damaged fabric display (1) porous island, where pores are between  
708 the fragments of non-clay and clay matrix; whereas other parts display (2) low porous islands made of  
709 fragment of non-clay minerals embedded in a dense, tight clay matrix. Pores within the porous island  
710 can be either filled with epoxy (in deep black pixel values) or not. Orientation of  $s_1$  is indicated in red.  
711 The dashed yellow lines indicate the boundaries between the damaged fabric and the host rock.

712 **Figure 12:** Conceptual model of microstructure development in triaxially deformed COX. (1) & (2)  
713 Micro-fracturing; (3 & 4) Cataclastic shearing with plasticity of phyllosilicates, macroscopic failure;  
714 (5) Resealing of the damage zone by shear and pore collapse, evolution of clay gouge. See text for  
715 details. CM: Clay Matrix; NCM: Non Clay Minerals.

716 .

717 **Figures**

718

719

720

721

722

723

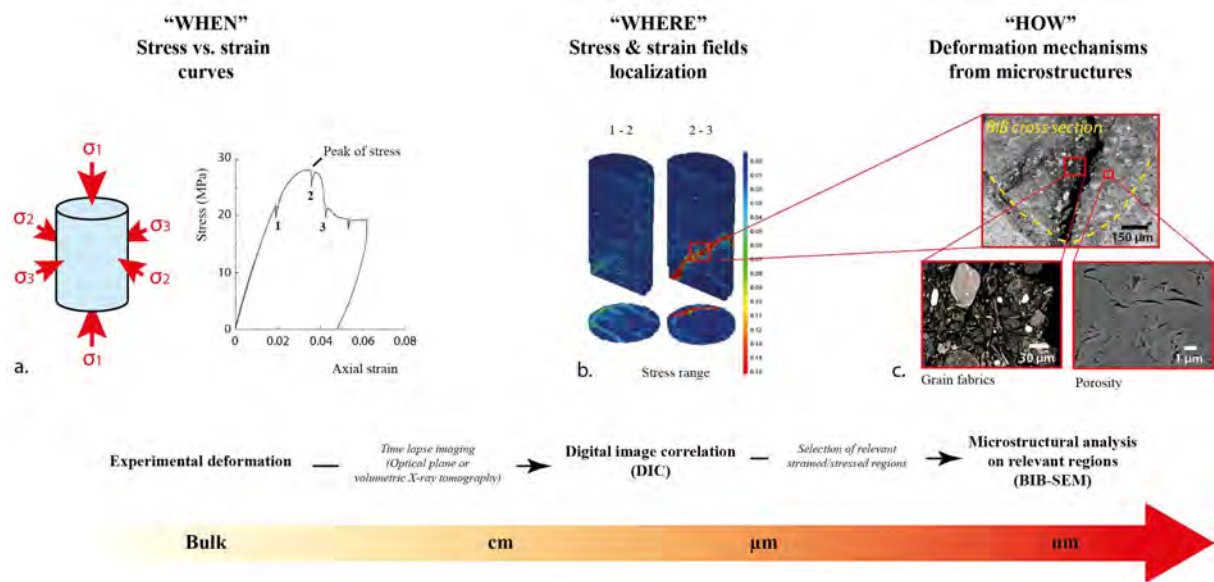

724

725 **Figure 1**

726

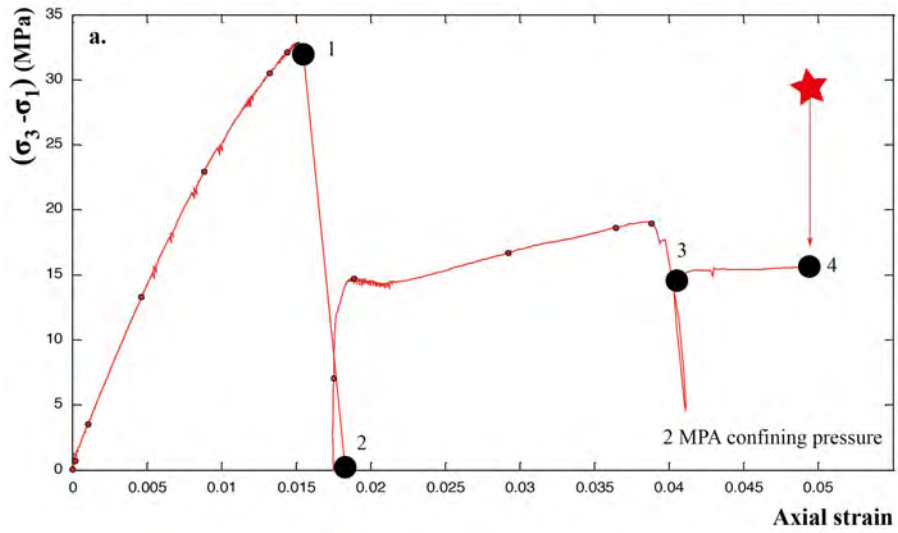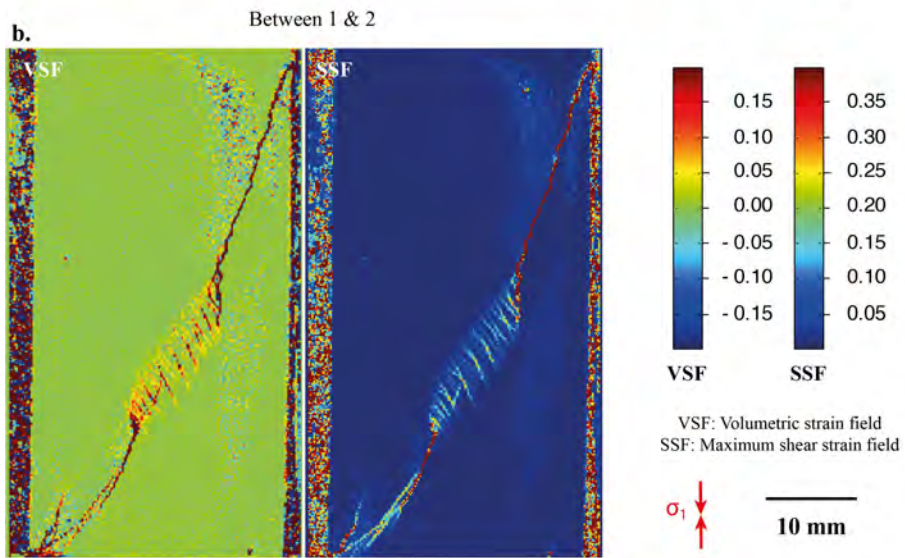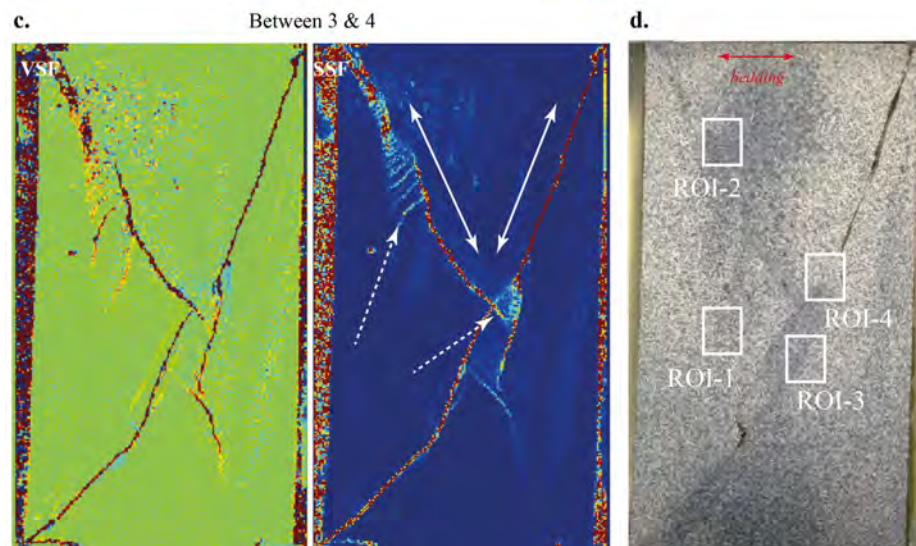

Figure 2

727

728

729



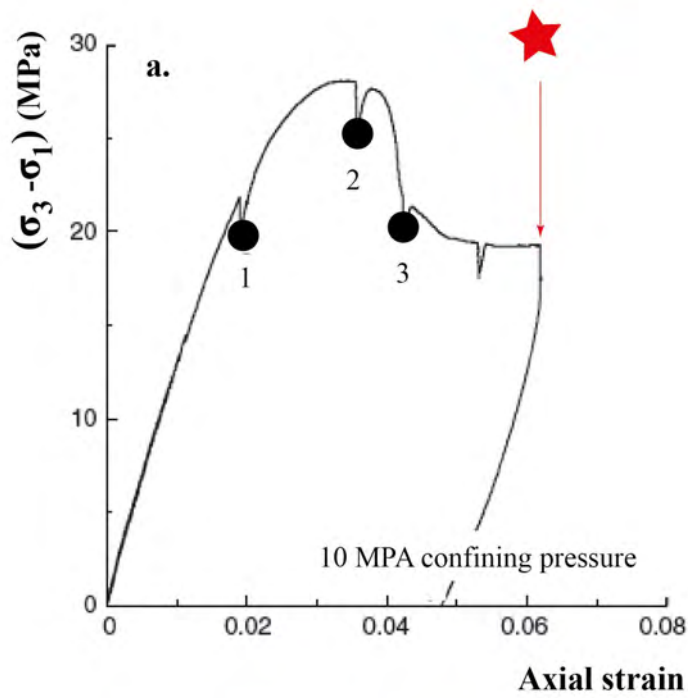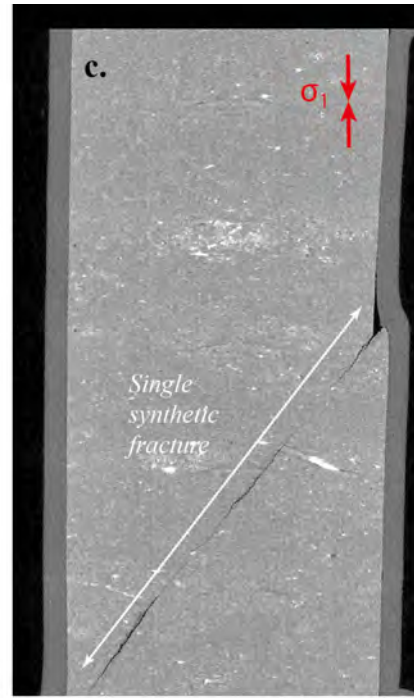

← 10 mm →

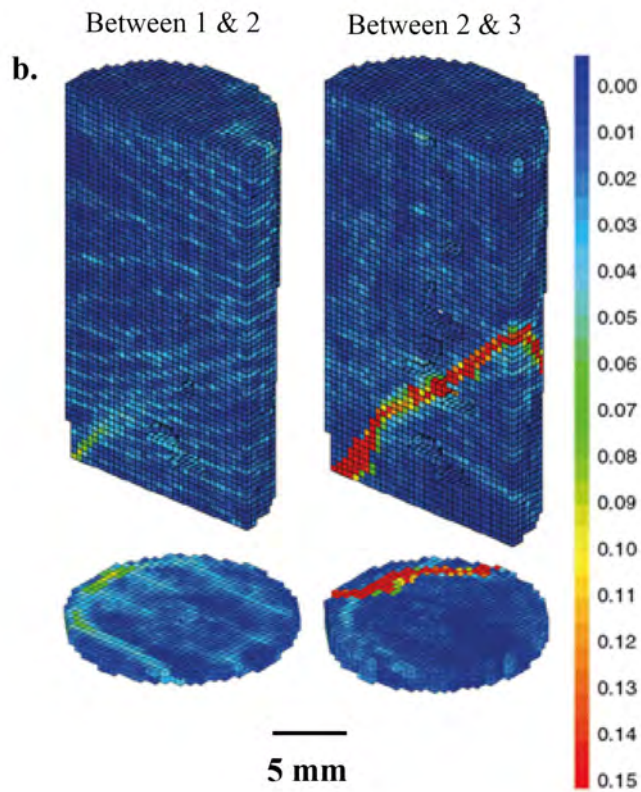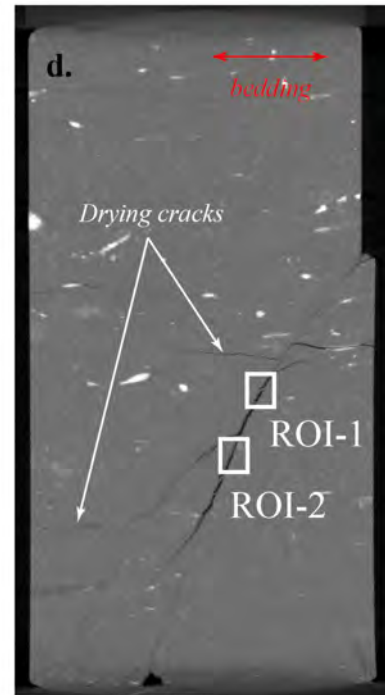

730

731 **Figure 3**

732



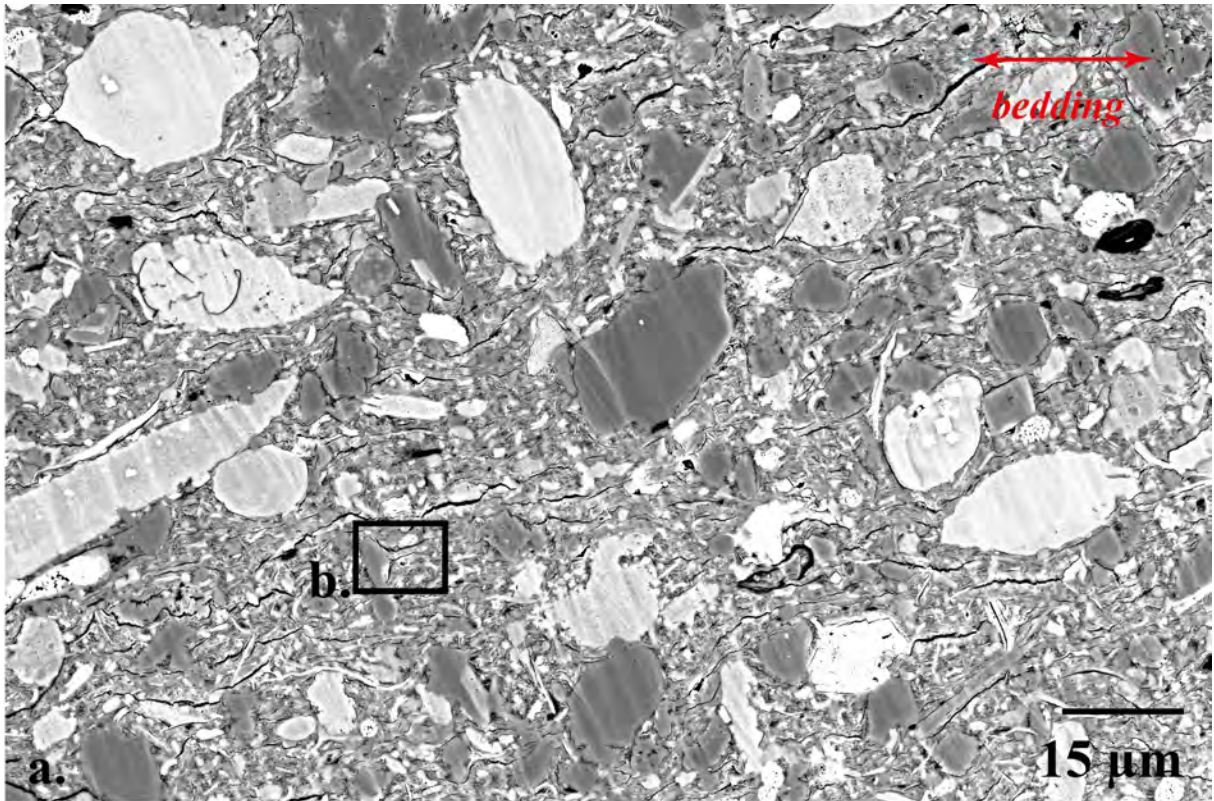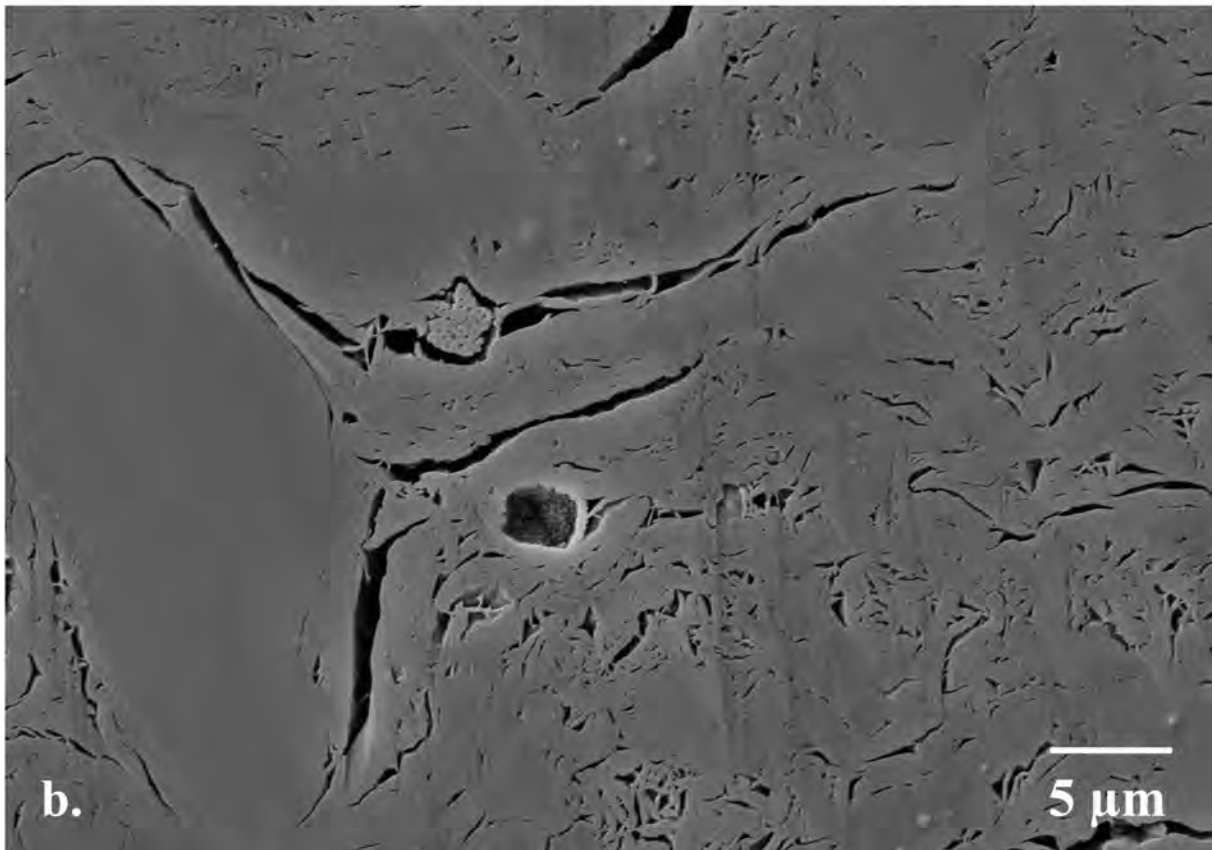

733

734 **Figure 4**

735



736

737

738

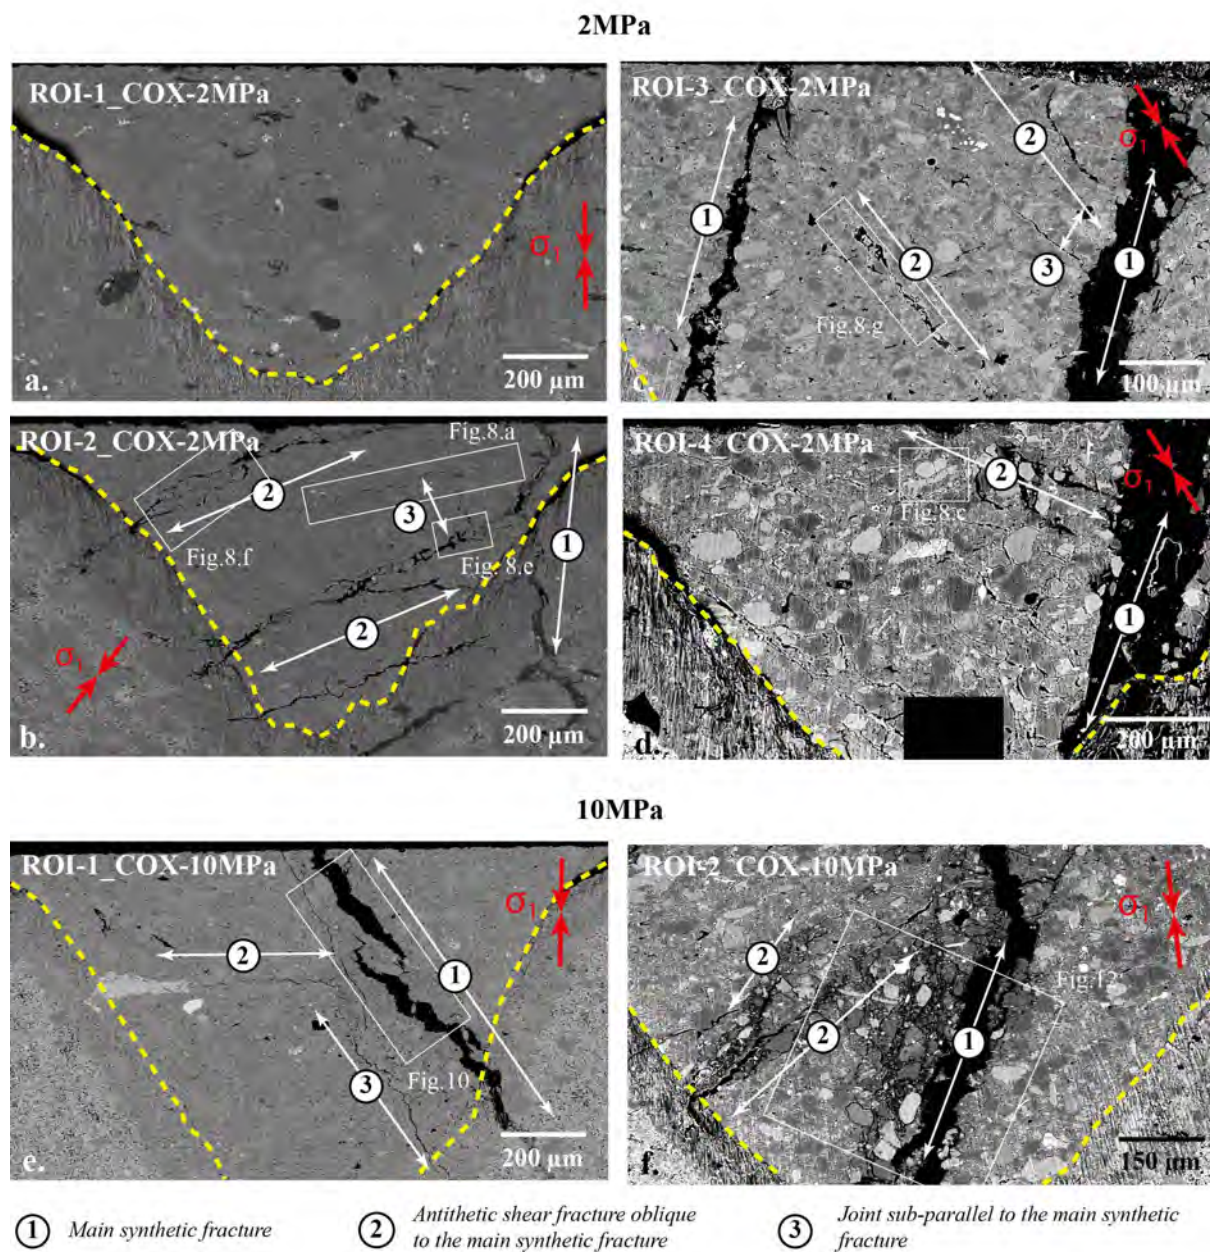

739

740 **Figure 5**

741

742

743

744

745

746

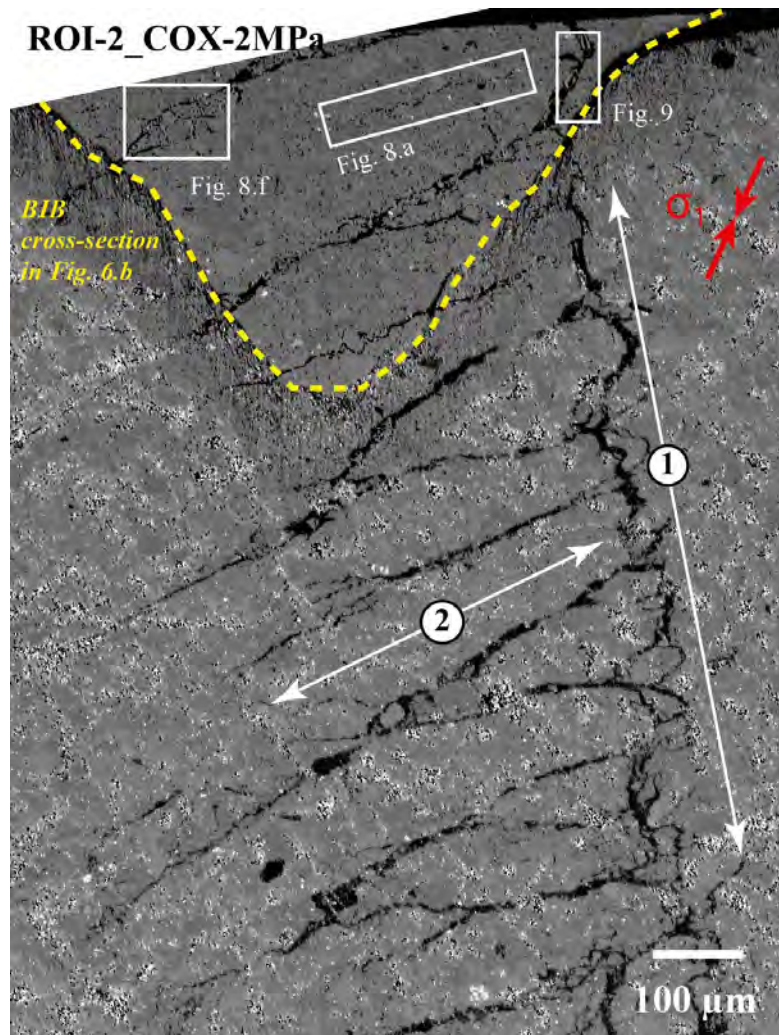

747

748 **Figure 6**

749



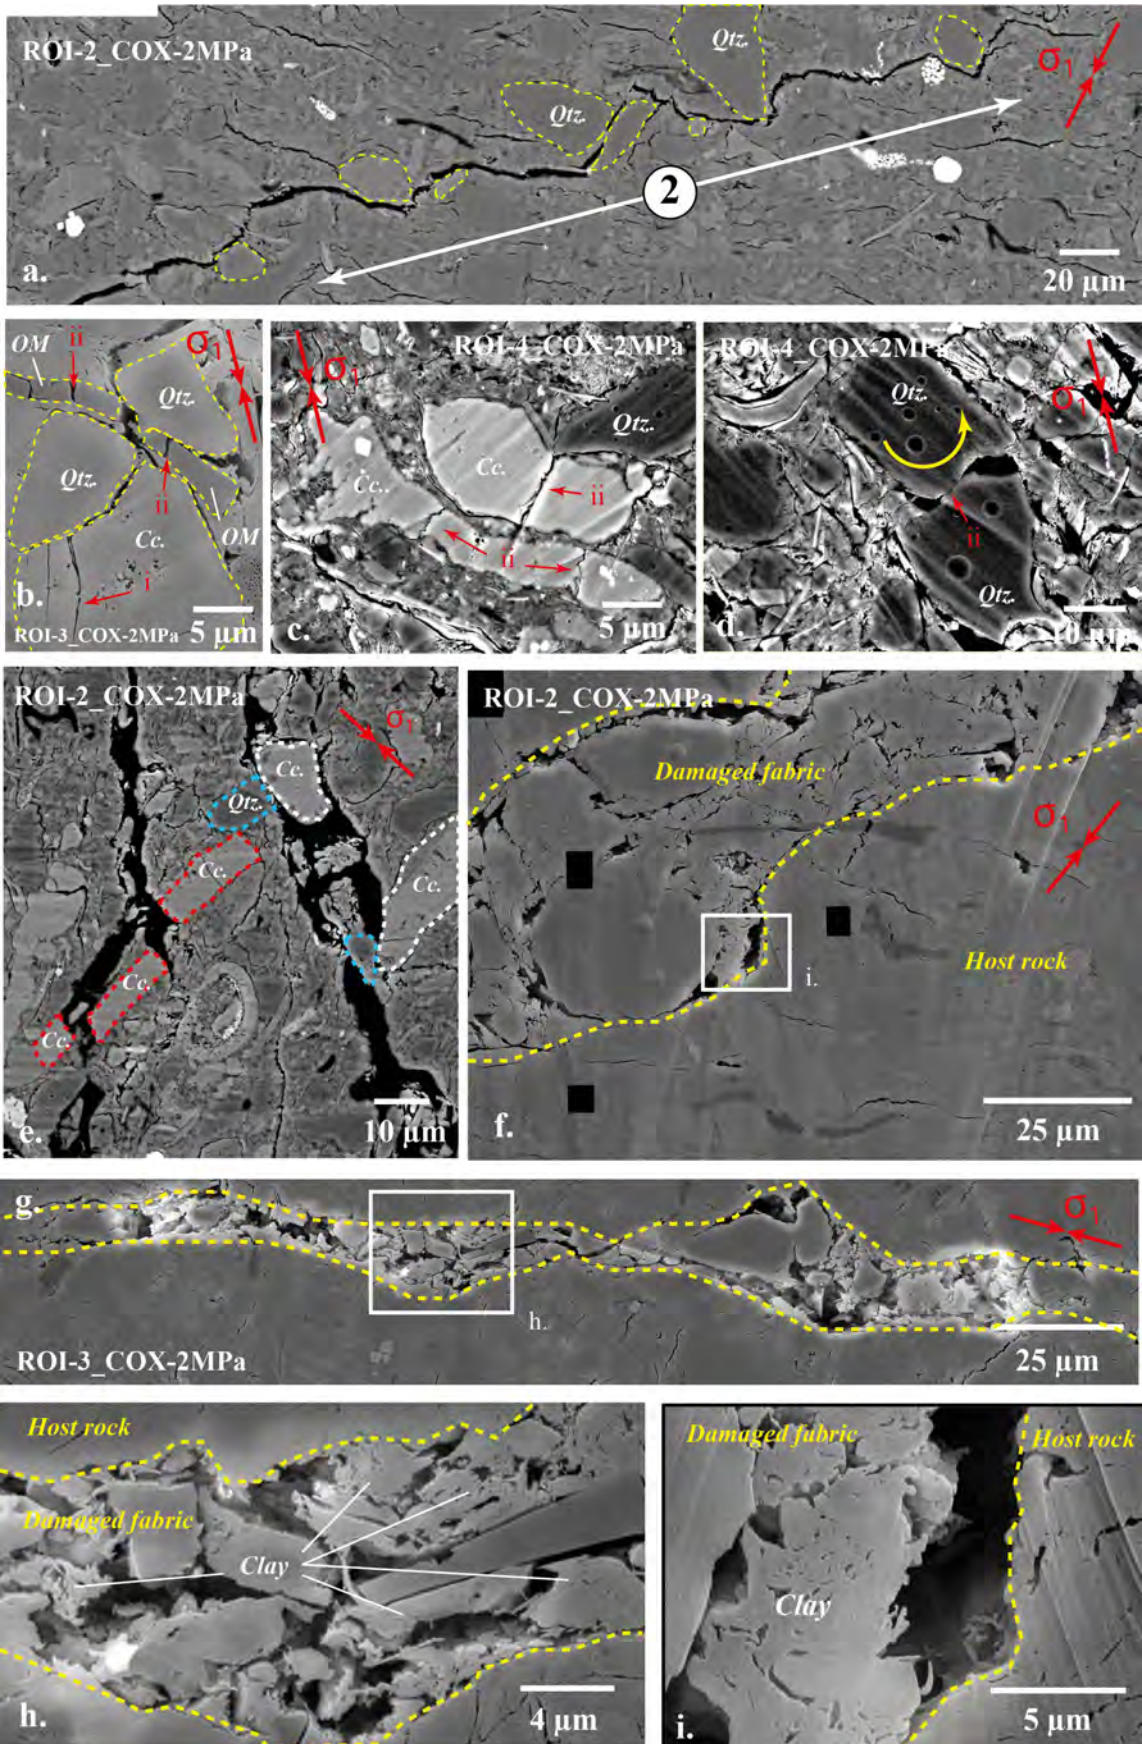

750

751

Figure 7

752

753

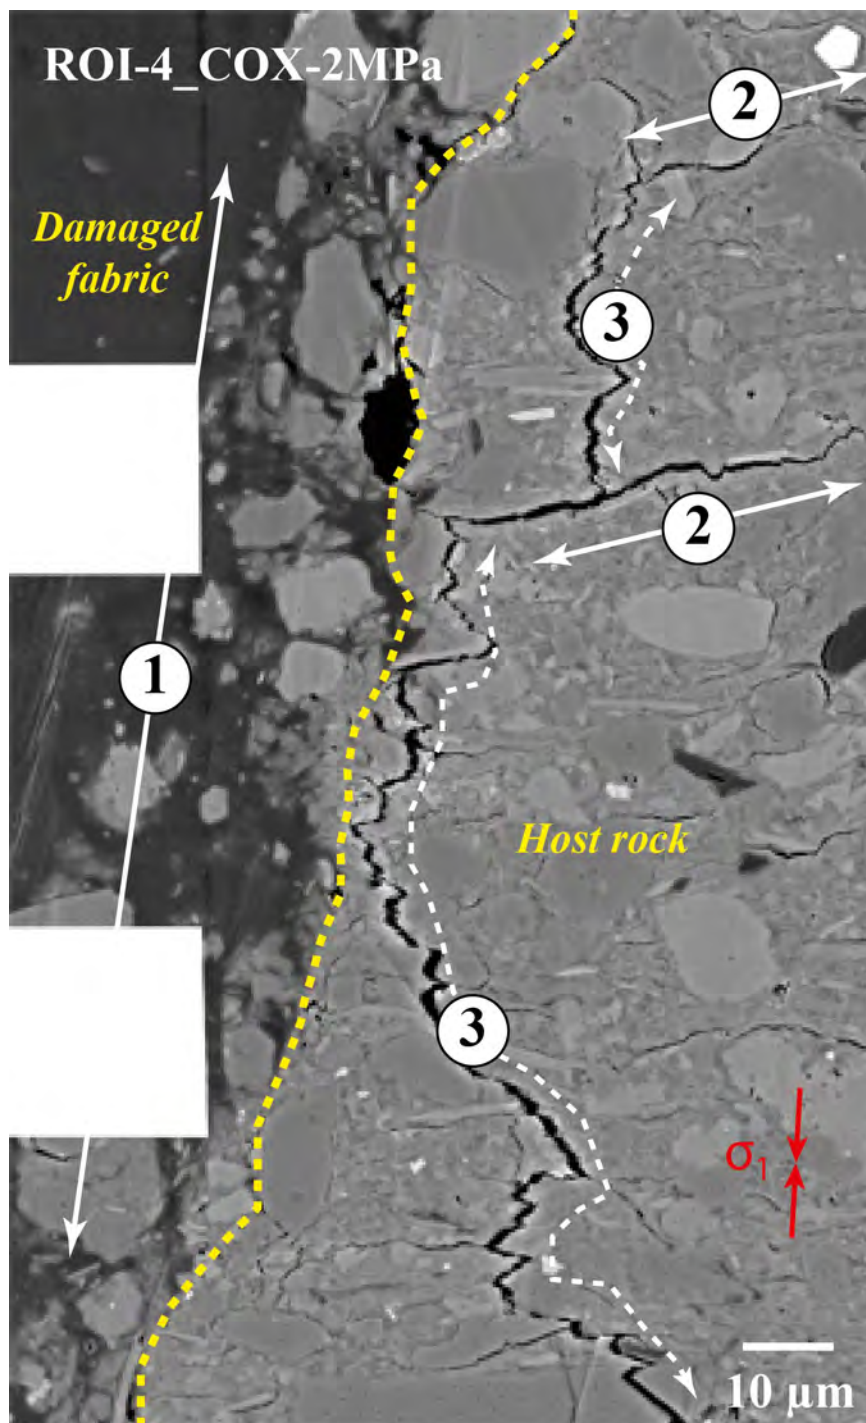

754

755 **Figure 8**

756

757



758

759

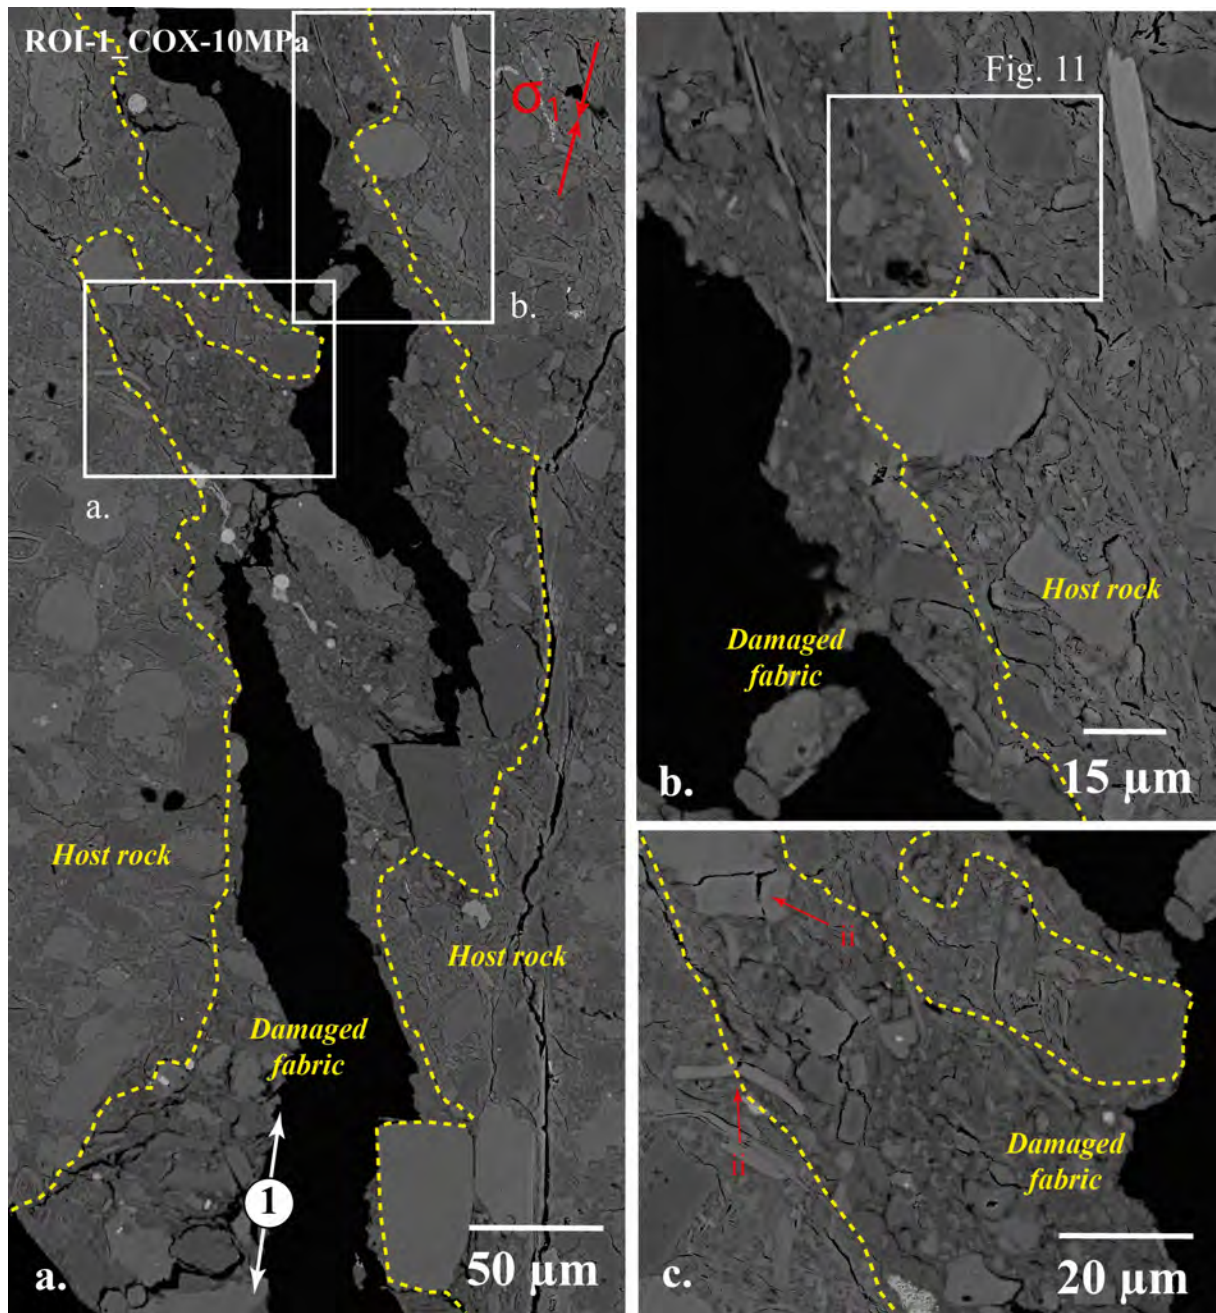

760

761 **Figure 9**

762

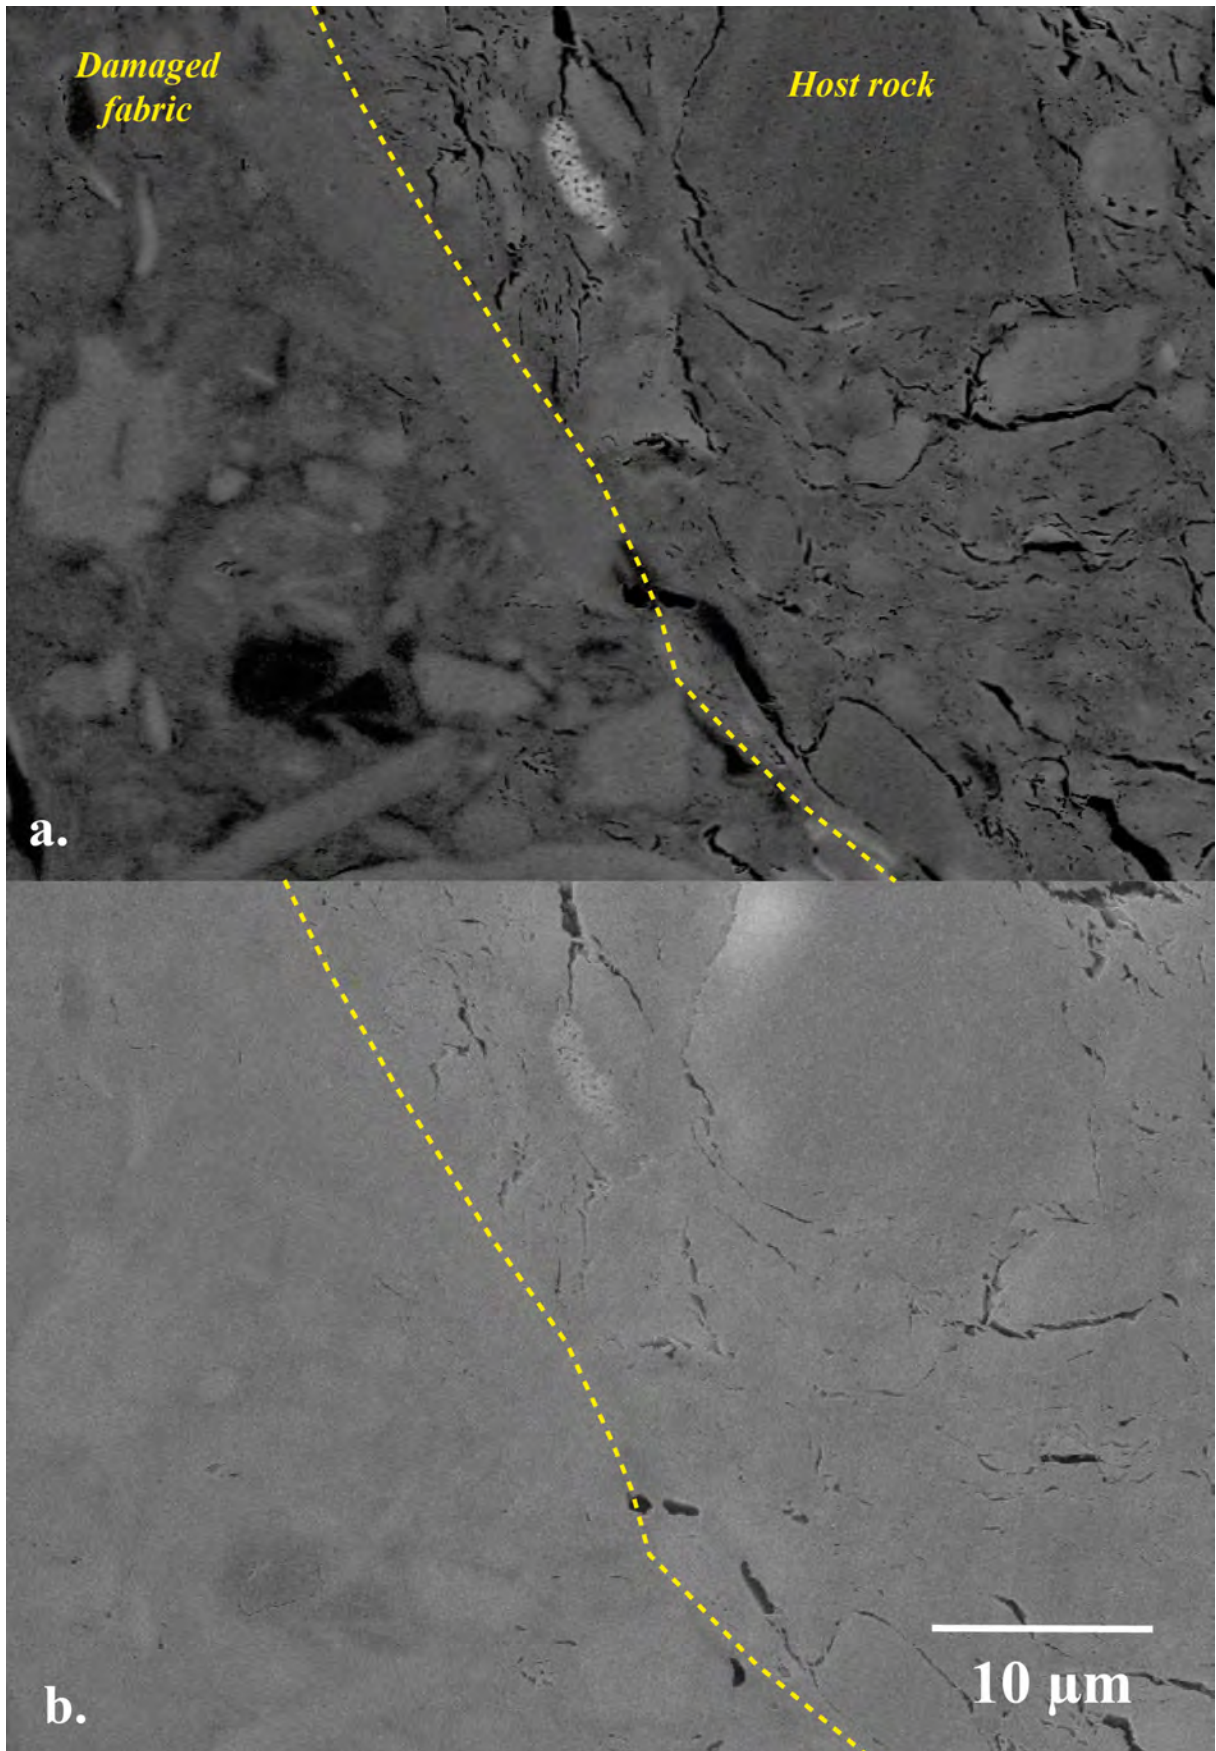

763

764

**Figure 10**



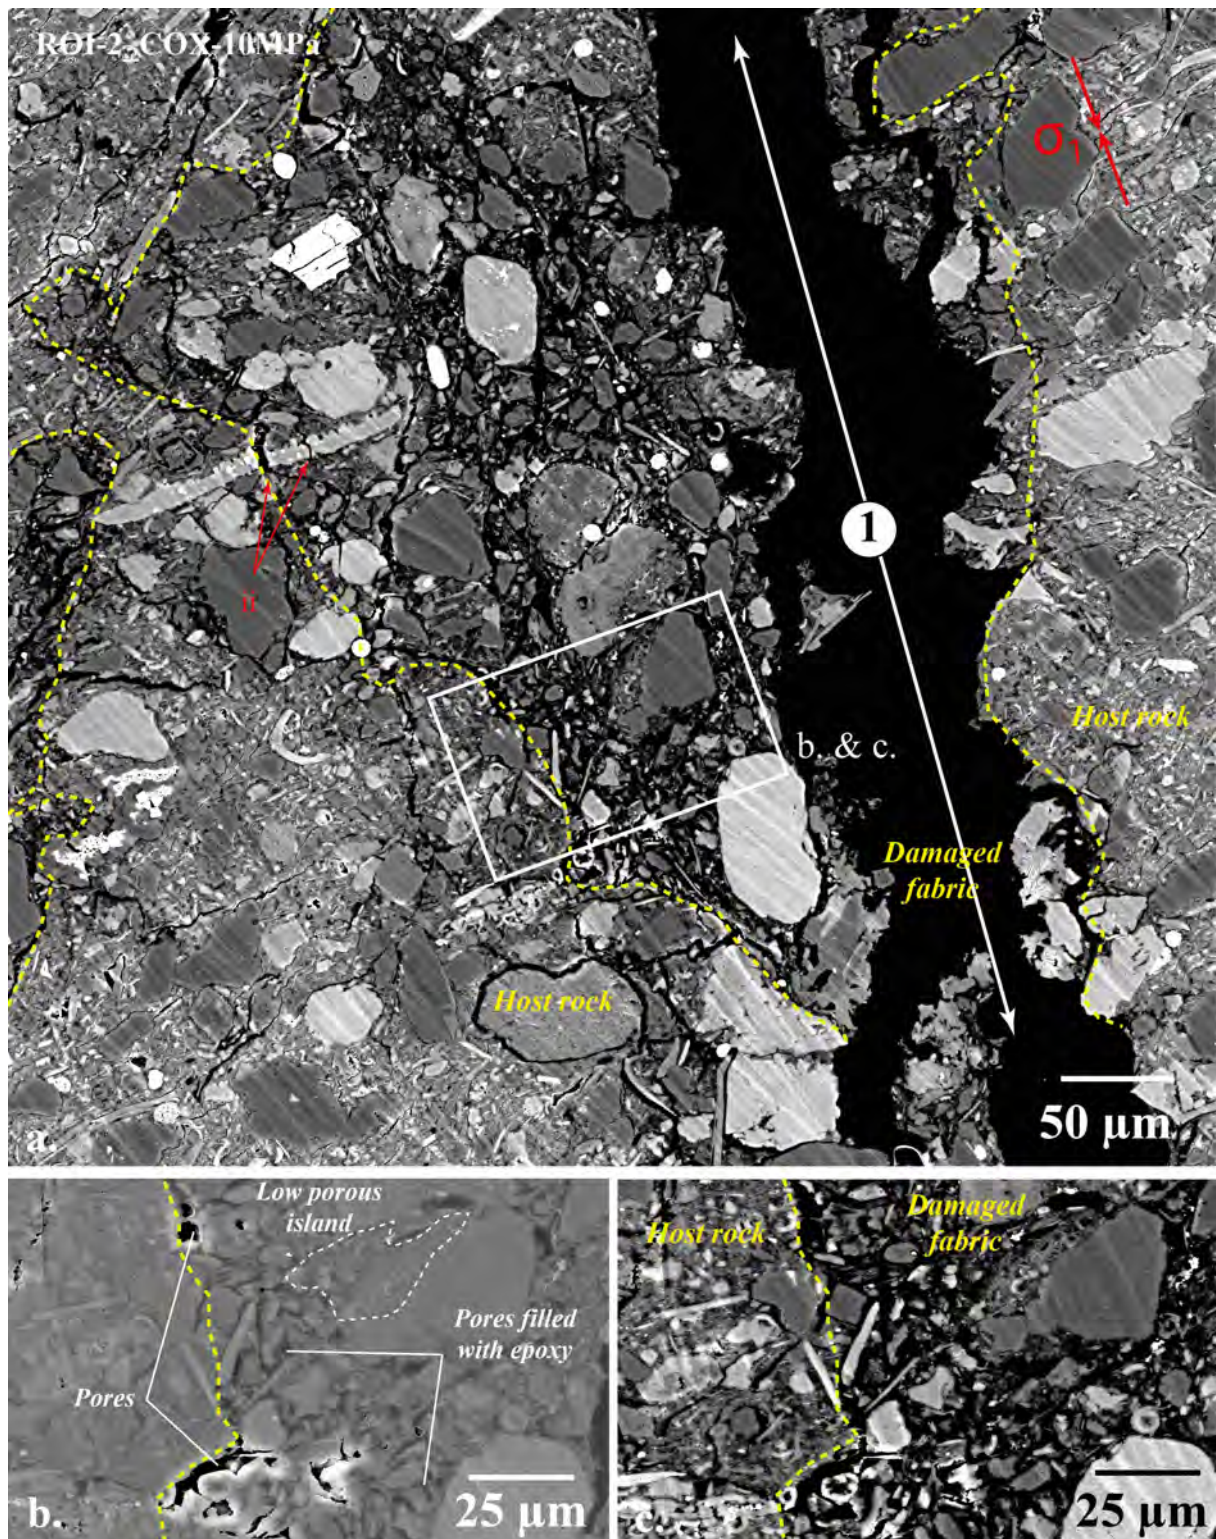

Figure 11



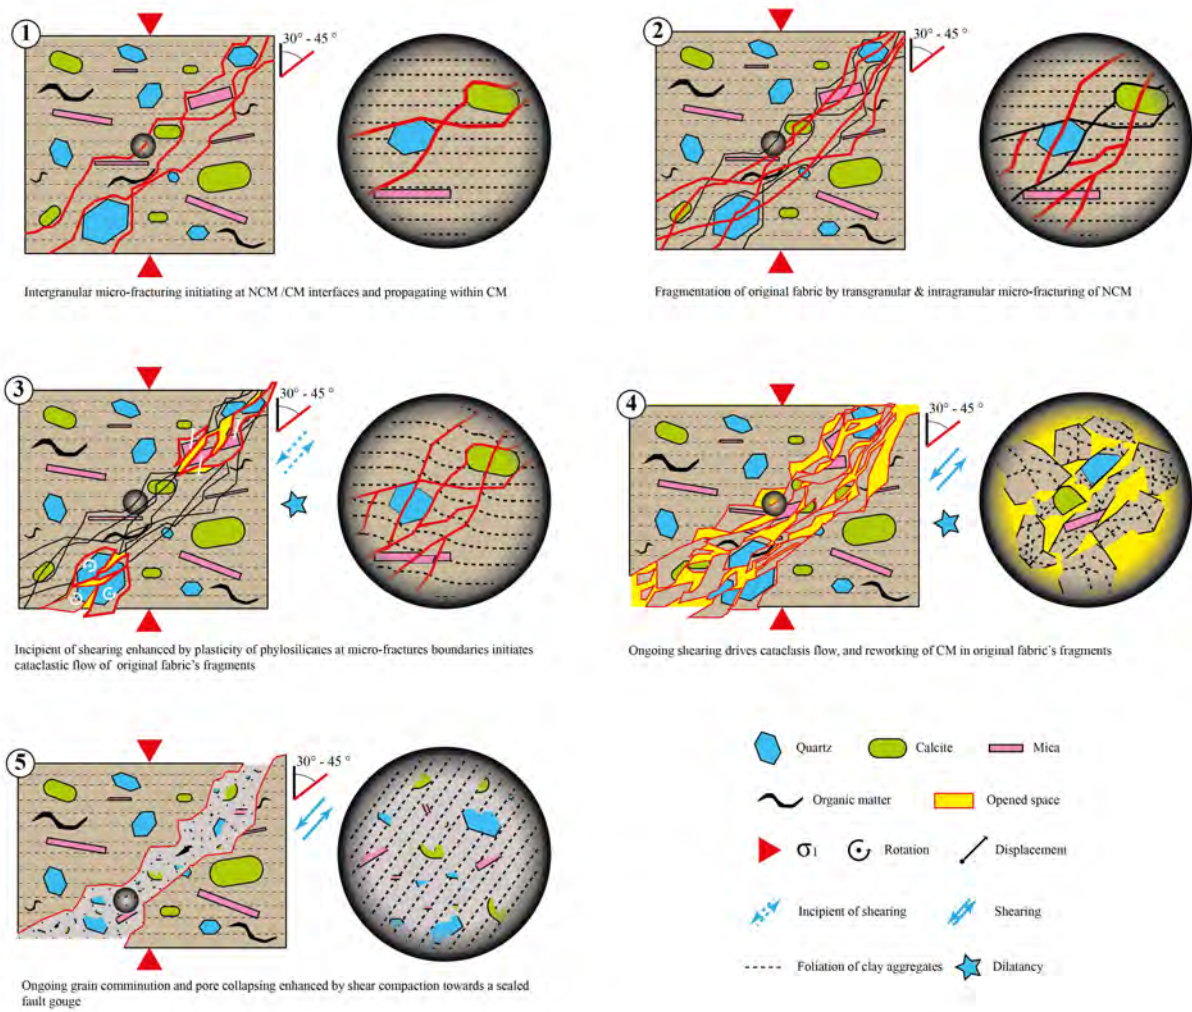

768

769 **Figure 12**

770

771
